# Supplementary material
Source: PubMed Central journal article supplement (PMC4522155)

## **SUPPORTING INFORMATION**

### **Epigenetic determinants of ovarian clear cell carcinoma biology**

Ken Yamaguchi<sup>1,2</sup>, Zhiqing Huang<sup>1</sup>, Noriomi Matsumura<sup>2</sup>, Masaki Mandai<sup>3</sup>, Zhiqing Huang<sup>1</sup>, Takako Okamoto<sup>2</sup>, Tsukasa Baba<sup>2</sup>, Ikuo Konishi<sup>2</sup>, Andrew Berchuck<sup>1</sup> and Susan K. Murphy<sup>1</sup>

<sup>1</sup> Department of Obstetrics and Gynecology, Duke University Medical Center, Durham NC, USA

<sup>2</sup> Department of Gynecology and Obstetrics, Graduate School of Medicine, Kyoto University, Kyoto, Japan

<sup>3</sup> Department of Obstetrics and Gynecology, Kinki University Faculty of Medicine, Osaka, Japan

### *Cell Lines and Clinical Samples*

The immortalized human ovarian surface epithelial (OSE) cell line HOSE/E7/hTERT was kindly provided by Dr. Hidetaka Katabuchi at Kumamoto University and was maintained as described <sup>1</sup>. The other immortalized OSE cell lines, IOSE80 and IOSE114, were kindly provided by Dr. Mythreye Karthikeyan at Duke University and were cultured as described <sup>2,3</sup>. The endometriosis cell line Hs832(c)T (derived from an ovarian endometriotic cyst) was purchased from the American Type Culture Collection (ATCC) and was cultured according to their protocol. Ovarian cancer cell lines, including 14 CCC and 32 non-CCC cell lines (Supplementary Table 1), were cultured in RPMI1640 media (Sigma-Aldrich Co., St. Louis, MO) supplemented with penicillin and streptomycin (100 U/mL penicillin, 100 µg/mL streptomycin; Invitrogen, Carlsbad, CA) and 10% heat inactivated fetal bovine serum (v/v; Invitrogen), RPMI1640/FBS/pen-strep medium, in an atmosphere of 5% CO<sub>2</sub> at 37°C. The short tandem repeat (STR) genotypes of all ovarian cancer cell lines were analyzed to authenticate the cell lines using either the PowerPlex<sup>®</sup> 1.2 System (Promega, Madison, WI) at The Fragment Analysis Facility of Johns Hopkins University or the AmpF $\ell$ STR<sup>®</sup> Identifier<sup>®</sup> Plus PCR Amplification Kit (Applied Biosystems, Carlsbad, CA) at the University of Colorado Cancer Center, DNA Sequencing and Analysis Core. The STR genotypes of ovarian cancer cell lines that are available from ATCC, RIKEN BioResource Center Cell Bank, or the Japanese Collection of Research Bioresources (JCRB) Cell Bank were identical to the source genotypes as reported within their respective STR databases and all

other non-commercially available cell lines were shown to be derived from females with unique genotypes.

Tissue specimens were derived from 85 patients with ovarian cancer treated at Duke University Medical Center, all of whom provided written informed consent (13 CCC, 53 SAC, 11EAC, and 8 MAC) and from eight patients without malignant disease (4 ovarian surface epithelium samples and 4 fallopian tube epithelium samples). Frozen tissue samples were embedded in optimal cutting temperature medium, and were stored at  $-80^{\circ}\text{C}$ . All sections were cut and mounted on slides to confirm that at least 60% of the cellular content comprised cancer cells with less than 20% necrosis. Tumors were histologically classified according to World Health Organization (WHO) criteria. Clinical staging was performed according to the International Federation of Obstetrics and Gynecology (FIGO) criteria. Evaluation was performed by two independent pathologists in the absence of clinical information.

#### *Extraction of Genomic DNA and Bisulfite Treatment*

Genomic DNA was extracted from cells cultured in a 10 cm dish when they reached 70-90% confluence using the QIAamp<sup>®</sup> DNA Mini Kit (Qiagen Inc., Valencia, CA) or from 5-20 mg of clinical tissues using the AllPrep<sup>®</sup> DNA/RNA/Protein Mini Kit (Qiagen Inc.). DNA quality and quantity were determined using a NanoDrop ND-1000 (Thermo Fisher Scientific, Wilmington, DE). Five hundred ng of genomic DNA with both  $A_{260}/A_{280}$  and  $A_{260}/A_{230} \geq 1.7$  were bisulfite modified using the EZ DNA Methylation<sup>™</sup> Kit (Zymo Research Co., Irvine, CA) according to the manufacturer's protocol for the Infinium

methylation assay, and 800 ng of genomic DNA was bisulfite modified using the same kit but according to standard protocol for methylation analysis of individual genes.

#### *Illumina Infinium HumanMethylation BeadChip Assay*

Genomic DNA was bisulfite modified using the EZ DNA Methylation Kit (Zymo Research; Irvine, CA). Bisulfite-converted genomic DNA was analyzed using Illumina's Infinium HumanMethylation27 BeadChip for cell line samples and HumanMethylation450 Beadchip for clinical tissue specimens (Illumina Inc., San Diego, CA). The HumanMethylation27 BeadChip contains 27,578 CpG loci covering 14,495 gene IDs as annotated by Illumina. The majority of the CpG dinucleotides on this platform (26,956; 97.7%) are located in close proximity to gene promoters with 20,006 (72.5%) located within CpG islands. The HumanMethylation450 BeadChip contains 485,836 CpG sites including those within CpG islands and in CpG island shores and shelves<sup>4</sup>, intergenic and intragenic CpG sites as well as CpGs identified as differentially methylated between tumor versus normal tissues. The HumanMethylation450 BeadChip includes 90% of the content contained on the HumanMethylation27 BeadChip. Chip processing was performed according to the manufacturer's protocol by Expression Analysis Inc., (Durham, NC), an Illumina Certified Service Provider. Data were extracted using Illumina<sup>®</sup> GenomeStudio<sup>™</sup> v2010.3 software (Illumina Inc.). Methylation values for each CpG locus are represented as  $\beta$ -values, a quantitative measure of DNA methylation, with levels ranging from 0 (completely unmethylated) to 1 (completely methylated). CpGenome Universal Methylated

DNA (Millipore Co., Billerica, MA) was used as a positive control. Other controls included human normal lymphocyte genomic DNA and a 50:50 mixture of the CpGenome Universal Methylated DNA and human normal lymphocyte genomic DNA. Replicate samples (N=6) were included on each of the six BeadChips run for the HumanMethylation27 BeadChip analysis to assess inter-chip reproducibility ( $r > 0.9991$ ,  $p < 0.000001$ ). Bisulfite conversion efficiency (i.e., the conversion of non-CpG cytosines to uracils) was assessed for all samples by Pyrosequencing (see below) prior to data generation using the Illumina BeadChips. At two independent chromosomal loci (*BRCA1* and *IGF2* for cell line samples, and *HNF1B* and *F2* for clinical tissues), average bisulfite conversion efficiency for all samples was 98.83% (+/-0.54% SD) for cell lines and 99.20% (+/-1.28% SD) for clinical tissues. We opted to use raw data for our analysis since the methylation levels as detected by quantitative bisulfite pyrosequencing were very strongly correlated with the methylation beta-values as detected on the HumanMethylation450 platform ( $0.939 < r < 0.981$ ,  $p < 0.000001$  for all genes analyzed; data not shown)

#### *Methylation Specific Polymerase Chain Reaction (MS-PCR)*

The DNA methylation status of estrogen receptor alpha (ERalpha) network genes (*ESR1*, *BMP4*, *DKK1*, *SOX11*, *SNCG* and *MOSCI*) was validated using MS-PCR. 46 cell lines (14 CCC and 32 non-CCC) and 84 (13 CCC and 71 non-CCC) clinical specimens were used for analysis. Genomic DNA (~800 ng) was modified with sodium bisulfite using the EZ DNA Methylation Kit (Zymo Research). Primer sequences and PCR conditions are shown in Supplemental Table 2a. Primers were designed such that they annealed to

sequence containing the CpG site analyzed for the given gene on the HumanMethylation450 beadchip, or were as close as possible to these CpG sites. HotStarTaq<sup>®</sup> DNA Polymerase (Qiagen) was used for MS-PCR with 20 ng of bisulfite modified DNA (EZ DNA Methylation Kit; Zymo Research) in a 12.5 µl reaction volume with 2 mM MgCl<sub>2</sub>, 10.4 mM dNTPs and 0.4 µM each primer. Cycling conditions included a 95°C incubation for 15 minutes followed by denaturation at 94°C for 30 seconds, annealing at the temperatures listed in Supplementary Table 2a for 30 seconds, and extension at 72°C for 30 seconds for the cycle number indicated in Supplementary Table 2a, followed by a 10 minute final extension at 72°C. The amplicons were resolved on 2% agarose gels and visualized by ethidium bromide staining. Specimens analyzed were scored as “methylated” if there were amplicons produced by the primers specific to the methylated sequence or by both the methylated and unmethylated sets of primers, or as “unmethylated” when amplicons were produced only from the primer set specific to the unmethylated sequence. Controls included bisulfite modified CpGenome Universal Methylated DNA (Millipore Co.), human normal lymphocyte genomic DNA and a 50:50 mixture of these DNAs.

### *Pyrosequencing*

All primers for pyrosequencing assays were designed using PSQ assay design software version 1.0.6 (Biotage, Uppsala, Sweden). The pyrosequencing assays were designed such that we could analyze the same CpG sites as those present on the Illumina BeadChip for eleven genes (*ESR1*, *HNF1A*, *HNF1B*, *C14orf105*, *KIF12*, *MIA2*, *PAX8*,

*SERPINA6*, *SGK2*, *SRC* and *TM4SF4*) and adjacent CpG sites for the *F2* gene. Primer sequences and PCR conditions are shown in Supplemental Table 2b. PCR was performed using ~40 ng of bisulfite modified genomic DNA as template per reaction (EZ DNA Methylation Kit; Zymo Research) with the PyroMark PCR Master Mix (Qiagen). Pyrosequencing was conducted using PyroMark Gold Q98 Reagents (Qiagen). Methylation values for each CpG site were calculated using Pyro Q-CpG software 1.0.9 (Biotage). The ten genes for which identical CpG sites were analyzed for validation purposes showed very strong positive correlations between the Infinium assay  $\beta$ -values and the percent methylation as measured by pyrosequencing ( $r > 0.9605$ ,  $p < 0.000001$  for all genes; Supplementary Figure 3). Adjacent CpG sites for these same ten genes also showed significant positive correlations between the  $\beta$ -values of the Infinium assay CpG sites and the percent methylation by pyrosequencing, as did the adjacent CpG sites measured for the *F2* gene ( $0.7498 < r < 0.9813$ ,  $p < 0.000001$  for all genes; Supplementary Figure 4).

#### *Real Time Polymerase Chain Reaction (RT-PCR)*

Two micrograms of total RNA prepared from 36 ovarian cancer cell lines (13 CCC, 13 SAC, 3 EAC, 4 MAC and 3 others) or 49 frozen tissues (13 CCC, 18 SAC, 12 EAC and 6 MAC) were used to generate cDNA in a 40  $\mu$ l volume with the Superscript II kit (Invitrogen). Two  $\mu$ l of the cDNA was used as template for real time PCR on an Applied Biosystems 7900HT Fast Real Time PCR instrument and TaqMan Assays on Demand per the manufacturer's instructions (Applied Biosystems) except that a 20  $\mu$ l reaction volume was used. Genes analyzed were *HNF1B* (Assay ID Hs01001602), *C14orf105*

(Hs00216847), *SGK2* (Hs00367639), *F2* (Hs01011988), *ESR1* (Hs00174860), *CRIP1* (Hs00832816), *SOX11* (Hs00846583), *IGFBP4* (Hs01057900) and *BMP4* (Hs00370078).

Expression of *B2M* (Hs 00187842) was measured in parallel for each specimen and used as a control for RNA input. Relative expression was calculated using the delta delta Ct method.

#### *5-Aza-2'-Deoxycytidine (Decitabine) Treatment*

RMG-2, RMG-5, and KOC-7C cell lines were cultured in RPMI1640 media (Sigma-Aldrich Co., St. Louis, MO) supplemented with penicillin and streptomycin (100 U/mL penicillin, 100 µg/mL streptomycin; Invitrogen) and 10% heat inactivated fetal bovine serum (v/v; Invitrogen) in an atmosphere of 5% CO<sub>2</sub> at 37°C. The cells were trypsinized and seeded into a 6-well plate. The following day the cells were treated in triplicate by adding RPMI1640/FBS/pen-strep media (mock) or the same media containing 5µM 5-aza-2'-deoxycytidine (Decitabine; Sigma-Aldrich Co). The media was replaced daily (with/without Decitabine as relevant) for three days after which the cells had reached 70% to 90% confluence and were harvested for DNA extraction as described above or RNA extraction using RNA Stat60 (Teltest; Friendswood TX). Real time RT-PCR and pyrosequencing analysis were performed as described above.

#### *Bioinformatics*

##### *Identification of genes showing differential methylation*

Identification of genes that show different methylation levels between groups was



done by comparing the  $\beta$ -values of these groups using unpaired t-tests with thresholds of  $p < 0.01$  and difference of average  $\beta$ -values  $> 0.2$  (20% methylation) for the comparison between ovarian cancer cell lines and normal cells or between CCC and non-CCC. Genes annotated by gene name or gene ID (Illumina annotation file) were used for the analyses.

#### *Unsupervised consensus clustering*

For evaluation of the similarity between genes or specimens, consensus clustering was applied to divide the data successively into  $k = 2, 3, 4 \dots$  clusters, with 80% bootstrapping of 300 subsamples of genes and/or samples using ConsensusCluster software<sup>5</sup>. All CpG sites on the HumanMethylation27 BeadChip (27,578 CpG sites) were analyzed and the CpG sites annotated by gene name on the HumanMethylation450 BeadChip. These were filtered to include those showing standard deviations of  $\beta$ -values  $> 0.1$  across samples (135,945 CpG sites) which were then used for unsupervised consensus clustering. All samples were divided into five clusters using K-Means clustering<sup>5</sup>.

#### *Identification of genes regulated by DNA methylation in ovarian cancer*

Two cell line microarray datasets [Gene Expression Omnibus (GEO) Accession Number: GSE25428 and GSE29175<sup>6,7</sup>] were used for the identification of candidate genes whose mRNA expression levels are regulated by DNA methylation in ovarian cancer. The ComBat normalizing algorithm was used before performing any analysis to reduce the likelihood of batch effects<sup>8</sup>. Candidate genes functionally regulated by methylation were identified based on the following criteria: 1) the p-value of unpaired Student t-tests is less

than 0.01; 2) the average  $\beta$ -value difference is more than 0.2 (20% methylation) between 14 CCC cell lines and 32 non-CCC cell lines; and 3) a significant inverse correlation ( $p < 0.05$ ) between expression microarray values and  $\beta$ -values from the Infinium assay for the 42 ovarian cancer cell lines with gene expression data. First, 856 genes (1 042 CpG sites) showed increased methylation, and 44 genes (54 CpG sites) showed decreased methylation in CCC as compared to non-CCC (Supplementary Figure 2a). Next, potential functional relationships between expression and methylation of the 856 HM and 44 UM CCC genes was assessed by determining if there were correlations between these values. Of 625 evaluable HM genes, 276 genes showed a significant inverse correlation ( $r < -0.3051$ ,  $p < 0.05$ ) between methylation and expression. Of the 33 evaluable UM genes, 22 showed a significant inverse correlation ( $r < -0.3217$ ,  $p < 0.05$ ) between methylation and expression (Supplementary Figure 2b). Published expression microarray datasets representing clinical ovarian cancer samples (GSE6008 and GSE2109) were used for external validation<sup>9, 10</sup>. Genes transcriptionally regulated by DNA methylation were used to conduct average-linkage hierarchical clustering of GSE6008 and GSE2109 datasets with Cluster version 3.0. (<http://rana.lbl.gov/eisen/>). Only the overlapping probe sets between the U133A and U133 plus 2.0 dataset (GSE2109) were used. For all analyses, levels of gene expression were standardized using mean-centering. Heat maps and dendrograms were generated with Java TreeView (<http://jtreeview.sourceforge.net/>).

### *Categorical Analyses*

The biological characteristics of the CCC-specific methylation signature were

evaluated using the enrichment of Molecular Signatures Database (MSigDB) gene sets (v2.5 updated April 7 2008) <sup>11</sup> with the R package *allez* 1.0 <sup>12</sup>. Briefly, for each gene set, the proportion of the annotated genes in the CCC hypermethylated or hypomethylated gene sets was compared to that for all probeset genes. A gene set was considered significantly enriched if the z-score was more than 4.0 <sup>13</sup>.

### *Pathway Analyses*

The relationship of hypermethylated or hypomethylated genes to particular pathways was evaluated using MetaCore™ software. (GeneGo; <http://www.genego.com/>), an integrated knowledge database and software suite for evaluation of the association between a particular gene list and known pathways.

### *Heatmap of beta-values and expression*

Absolute beta-values are represented by color gradient intensity, from white; beta-value =0, to red; beta-value =1, using Java TreeView (<http://jtreeview.sourceforge.net/>). Average-linkage hierarchical clustering was performed in GSE6008 and GSE2109 (clinical ovarian cancer datasets) expression datasets using genes transcriptionally regulated by DNA methylation with Cluster version 3.0. (<http://rana.lbl.gov/eisen/>). For all analyses, levels of gene expression were standardized using mean-centering. Heatmaps and dendrograms were generated with Java TreeView.

### *Statistical Analyses*

The Mann-Whitney test was used to compare continuous variables between groups. Fisher's exact test was used for analysis of categorical variables. Correlations between expression microarray values and methylation beta-values from the Infinium assay or between beta-values and % methylation values from pyrosequencing were evaluated using Pearson's correlation. P-values less than 0.05 were considered statistically significant.

## References

1. Maeda T, Tashiro H, Katabuchi H, Begum M, Ohtake H, Kiyono T, Okamura H. Establishment of an immortalised human ovarian surface epithelial cell line without chromosomal instability. *British Journal of Cancer* 2005;93:116-23.
2. Maines-Bandiera SL, Kruk PA, Auersperg N. Simian virus 40-transformed human ovarian surface epithelial cells escape normal growth controls but retain morphogenetic responses to extracellular matrix. *Am J Obstet Gynecol* 1992;167:729-35.
3. Auersperg N, Maines-Bandiera SL, Dyck HG, Kruk PA. Characterization of cultured human ovarian surface epithelial cells: phenotypic plasticity and premalignant changes. *Lab Invest* 1994;71:510-8.
4. Irizarry RA, Ladd-Acosta C, Wen B, Wu Z, Montano C, Onyango P, Cui H, Gabo K, Rongione M, Webster M, Ji H, Potash JB, et al. The human colon cancer methylome shows similar hypo- and hypermethylation at conserved tissue-specific CpG island shores. *Nat Genet* 2009;41:178-86.
5. Seiler M, Huang CC, Szalma S, Bhanot G. ConsensusCluster: a software tool for unsupervised cluster discovery in numerical data. *OMICS* 2010;14:109-13.
6. Matsumura N, Huang Z, Mori S, Baba T, Fujii S, Konishi I, Iversen ES, Berchuck A, Murphy SK. Epigenetic suppression of the TGF-beta pathway revealed by transcriptome profiling in ovarian cancer. *Genome Res* 2010.
7. Yamaguchi K, Mandai M, Oura T, Matsumura N, Hamanishi J, Baba T, Matsui S, Murphy SK, Konishi I. Identification of an ovarian clear cell carcinoma gene signature that

reflects inherent disease biology and the carcinogenic processes. *Oncogene* 2010;29:1741-52.

8. Johnson WE, Li C, Rabinovic A. Adjusting batch effects in microarray expression data using empirical Bayes methods. *Biostatistics* 2007;8:118-27.

9. Marquez RT, Baggerly KA, Patterson AP, Liu J, Broaddus R, Frumovitz M, Atkinson EN, Smith DI, Hartmann L, Fishman D, Berchuck A, Whitaker R, et al. Patterns of gene expression in different histotypes of epithelial ovarian cancer correlate with those in normal fallopian tube, endometrium, and colon. *Clin Cancer Res* 2005;11:6116-26.

10. Wu R, Hendrix-Lucas N, Kuick R, Zhai Y, Schwartz DR, Akyol A, Hanash S, Misek DE, Katabuchi H, Williams BO, Fearon ER, Cho KR. Mouse model of human ovarian endometrioid adenocarcinoma based on somatic defects in the Wnt/beta-catenin and PI3K/Pten signaling pathways. *Cancer Cell* 2007;11:321-33.

11. Subramanian A, Tamayo P, Mootha VK, Mukherjee S, Ebert BL, Gillette MA, Paulovich A, Pomeroy SL, Golub TR, Lander ES, Mesirov JP. Gene set enrichment analysis: a knowledge-based approach for interpreting genome-wide expression profiles. *Proc Natl Acad Sci U S A* 2005;102:15545-50.

12. Newton MA, Quintana FA, den Boon JA, Sengupta S, Ahlquist P. Random-set methods identify distinct aspects of the enrichment signal in gene-set analysis. *Annals of Applied Statistics* 2007;1:85-106.

13. Pyeon D, Newton MA, Lambert PF, den Boon JA, Sengupta S, Marsit CJ, Woodworth CD, Connor JP, Haugen TH, Smith EM, Kelsey KT, Turek LP, et al. Fundamental differences in cell cycle deregulation in human papillomavirus-positive and

human papillomavirus-negative head/neck and cervical cancers. *Cancer Res* 2007;67:4605-

19.

| <b>Supplementary Table 1 Cell Lines</b> |             |                        |                                |                                |                                |                           |
|-----------------------------------------|-------------|------------------------|--------------------------------|--------------------------------|--------------------------------|---------------------------|
| <b>#</b>                                | <b>Name</b> | <b>Organ-Histology</b> | <b>46<br/>OvCa<sup>a</sup></b> | <b>42<br/>OvCa<sup>b</sup></b> | <b>36<br/>OvCa<sup>c</sup></b> | <b>Source<sup>d</sup></b> |
| 1                                       | 41M         | SAC                    | 1                              | 1                              |                                | Kyoto Univ.               |
| 2                                       | A2780-NCI   | adenocarcinoma         | 1                              |                                | 1                              | ATCC                      |
| 3                                       | Caov-3      | SAC                    | 1                              | 1                              | 1                              | Duke                      |
| 4                                       | DOV13       | adenocarcinoma         | 1                              | 1                              |                                | Duke                      |
| 5                                       | ES-2        | CCC                    | 1                              |                                |                                | ATCC                      |
| 6                                       | FUOV1       | SAC                    | 1                              | 1                              |                                | Duke                      |
| 7                                       | Hey         | SAC                    | 1                              | 1                              | 1                              | Duke                      |
| 8                                       | IGROV1-NCI  | EAC                    | 1                              |                                | 1                              | ATCC                      |
| 9                                       | JHOC-5      | CCC                    | 1                              | 1                              | 1                              | Riken                     |
| 10                                      | JHOC-7      | CCC                    | 1                              | 1                              | 1                              | Riken                     |
| 11                                      | JHOC-8      | CCC                    | 1                              | 1                              | 1                              | Riken                     |
| 12                                      | JHOC-9      | CCC                    | 1                              | 1                              | 1                              | Riken                     |
| 13                                      | JHOM-1      | MAC                    | 1                              | 1                              | 1                              | Riken                     |
| 14                                      | JHOM-2B     | MAC                    | 1                              | 1                              | 1                              | Riken                     |
| 15                                      | JHOS-2      | SAC                    | 1                              | 1                              | 1                              | Riken                     |
| 16                                      | JHOS-3      | SAC                    | 1                              | 1                              | 1                              | Riken                     |
| 17                                      | JHOS-4      | SAC                    | 1                              | 1                              | 1                              | Riken                     |
| 18                                      | KOC-5c      | CCC                    | 1                              | 1                              | 1                              | Kurume Univ.              |
| 19                                      | KOC-7c      | CCC                    | 1                              | 1                              | 1                              | Tottori Univ.             |
| 20                                      | MCAS        | MAC                    | 1                              | 1                              | 1                              | Kyoto Univ.               |
| 21                                      | OVCAR-3     | Undifferentiated       | 1                              | 1                              | 1                              | Duke                      |
| 22                                      | OMC-3       | MAC                    | 1                              | 1                              | 1                              | Riken                     |
| 23                                      | OV90        | SAC                    | 1                              | 1                              | 1                              | Duke                      |
| 24                                      | ovary1847   | SAC                    | 1                              | 1                              | 1                              | Duke                      |
| 25                                      | OVCA420     | SAC                    | 1                              | 1                              | 1                              | Duke                      |
| 26                                      | OVCA429     | SAC                    | 1                              | 1                              | 1                              | Duke                      |
| 27                                      | OVCA432     | SAC                    | 1                              | 1                              | 1                              | Duke                      |
| 28                                      | OVCAR2      | adenocarcinoma         | 1                              | 1                              |                                | Duke                      |
| 29                                      | OVCAR4-NCI  | adenocarcinoma         | 1                              |                                |                                | ATCC                      |
| 30                                      | OVCAR5      | adenocarcinoma         | 1                              | 1                              |                                | Duke                      |
| 31                                      | OVCAR8      | adenocarcinoma         | 1                              | 1                              | 1                              | Duke                      |
| 32                                      | OVISE       | CCC                    | 1                              | 1                              | 1                              | Yokohama City Univ.       |
| 33                                      | OVK-18      | EAC                    | 1                              | 1                              | 1                              | Riken                     |
| 34                                      | OVTOKO      | CCC                    | 1                              | 1                              | 1                              | Yokohama City Univ.       |
| 35                                      | PA1         | Teratocarcinoma        | 1                              | 1                              |                                | Duke                      |
| 36                                      | PEO1        | SAC                    | 1                              | 1                              | 1                              | Duke                      |



|    |               |                                                  |   |   |   |                     |
|----|---------------|--------------------------------------------------|---|---|---|---------------------|
| 37 | RMG-I         | CCC                                              | 1 | 1 | 1 | Keio Univ.          |
| 38 | RMG-II        | CCC                                              | 1 | 1 | 1 | Keio Univ.          |
| 39 | RMG-V         | CCC                                              | 1 | 1 | 1 | Keio Univ.          |
| 40 | SK-OV-3       | SAC                                              | 1 | 1 | 1 | Duke                |
| 41 | SK-OV-8       | unknown                                          | 1 | 1 |   | Duke                |
| 42 | TAYA          | CCC                                              | 1 | 1 | 1 | Jichi Medical Univ. |
| 43 | TOV-112D      | EAC                                              | 1 | 1 | 1 | Duke                |
| 44 | TOV-21G       | CCC                                              | 1 | 1 | 1 | Duke                |
| 45 | TYK-nu        | Undifferentiated                                 | 1 | 1 | 1 | Kyoto Univ.         |
| 46 | UWB1.289      | SAC                                              | 1 |   |   | ATCC                |
| 47 | HOSE/E7/hTERT | Immortalized ovarian surface epithelium (normal) |   |   |   | Kumamoto Univ.      |
| 48 | IOSE80        | Immortalized ovarian surface epithelium (normal) |   |   |   | Duke                |
| 49 | IOSE144       | Immortalized ovarian surface epithelium (normal) |   |   |   | Duke                |
| 50 | Hs832.(C)T    | Endometriosis (normal)                           |   |   |   | ATCC                |
| 2' | A2780-J       | adenocarcinoma                                   |   | 1 |   | Kyoto Univ.         |

a. Used for the identification of differentially methylated genes

b. Used for a calculation of inverse correlation between expression values and beta-values

c. Used for RT-PCR

d. ATCC: the American Type Culture Collection

Riken: RIKEN BioResource Center Cell Bank

Kuruma Univ., Tottori Univ., Yokohama City Univ., Keio Univ., Jichi Medical Univ., and

Kumamoto Univ. kindly provided cell lines for us.

| <b>Supplementary Table 2a MS-PCR primers</b> |                      |                                            |                  |
|----------------------------------------------|----------------------|--------------------------------------------|------------------|
| <b>Gene Name</b>                             | <b>Primers</b>       | <b>Primer Sequences</b>                    | <b>Annealing</b> |
| <i>ESR1</i>                                  | Methylated Forward   | CGAGTTGGAGTTTTTGAATCGTTC                   | 57 °C x 40       |
|                                              | Methylated Reverse   | CTACGCGTTAACGACGACCG                       |                  |
|                                              | Unmethylated Forward | ATGAGTTGGAGTTTTTGAATTGTTT                  | 57 °C x 35       |
|                                              | Unmethylated Reverse | ATAAACCTACACATTAACAACAACCA                 |                  |
| <i>BMP4</i>                                  | Methylated Forward   | TTTGCGTAGAGCGATTTACGCGC                    | 73 °C x 5 >      |
|                                              | Methylated Reverse   | CTTCCTCCRTTACACCAACAACA                    | 70 °C x 5 >      |
|                                              | Unmethylated Forward | GGTTTTTGTGTAGAGTGATTTATGTGT                | 67 °C x 5 >      |
|                                              | Unmethylated Reverse | CTTCCTCCRTTACACCAACAACA                    | 64 °C x 30       |
| <i>DKK1</i>                                  | Methylated Forward   | GTCGGAATGTTTCGGGTTTCGC                     | 72 °C x 5 >      |
|                                              | Methylated Reverse   | AAACCTAAATCCCCACGAAAC                      | 70 °C x 5 >      |
|                                              | Unmethylated Forward | GGGGTTGGAATGTTTTGGGTTTGT                   | 68 °C x 30       |
|                                              | Unmethylated Reverse | CAAACCTAAATCCCCACAAAACCA                   | 72 °C x 5 >      |
| <i>MOSCI</i>                                 | Methylated Forward   | TTAATGTAGTTTTAGTTCGAGGTTTTT<br>CGTC        | 70 °C x 5 >      |
|                                              | Methylated Reverse   | AAAAAAAAATACTACCAAACCTCCGC<br>G            | 67 °C x 5 >      |
|                                              | Unmethylated Forward | TTGTTAATGTAGTTTTAGTTTGAGGTTT<br>TTTGTT     | 64 °C x 30       |
|                                              | Unmethylated Reverse | AAAAAAAAATACTACCAAACCTCCAC<br>ACC          | 70 °C x 5 >      |
| <i>SNCG</i>                                  | Methylated Forward   | TAAGTTCGTAGTTCGTAGGGAGATTTA<br>GTTTC       | 70 °C x 5 >      |
|                                              | Methylated Reverse   | ATCTTTTCCACCGACCCACCACG                    | 71 °C x 5 >      |
|                                              | Unmethylated Forward | GTTTAAGTTTGTAGTTTGTAGGGAGAT<br>TTAGTTTTG   | 68 °C x 5 >      |
|                                              | Unmethylated Reverse | TAATCTTTTCCACCACCCACCACAC                  | 65 °C x 30       |
| <i>SOX11</i>                                 | Methylated Forward   | ATTATGGAGTAGTTTTTCGGATATGTAT<br>AACGTC     | 74 °C x 5 >      |
|                                              | Methylated Reverse   | TTATAATCGAAATAATCGACCATATAC<br>TTAAACCG    | 71 °C x 5 >      |
|                                              | Unmethylated Forward | AAGATTATGGAGTAGTTTTTGGATATG<br>TATAATGTT   | 68 °C x 5 >      |
|                                              | Unmethylated Reverse | ATACTTATAATCAAATAATCAACCAT<br>ATACTTAAACCA | 65 °C x 30       |
|                                              |                      |                                            | 70 °C x 5 >      |
|                                              |                      |                                            | 67 °C x 5 >      |
|                                              |                      |                                            | 64 °C x 30       |
|                                              |                      |                                            | 70 °C x 5 >      |
|                                              |                      |                                            | 67 °C x 5 >      |
|                                              |                      |                                            | 64 °C x 30       |

| <b>Supplementary Table 2b</b> Pyrosequencing primers |               |                                   |                                                         |
|------------------------------------------------------|---------------|-----------------------------------|---------------------------------------------------------|
| <b>Gene Name</b>                                     | <b>Primer</b> | <b>Primer Sequence (5' to 3')</b> | <b>T<sub>anneal</sub> and cycles</b>                    |
| <i>HNFI1A</i>                                        | Forward       | AGTTGGTTGAGTTGTTTAATG             | 57 °C x 55                                              |
|                                                      | Reverse*      | CCTCCTCAAAACTAAAATTCT             |                                                         |
|                                                      | Sequencing    | GGTTGAGTTGTTTAATG                 |                                                         |
| <i>HNFI1B</i>                                        | Forward       | GTAGTGTTTTTTTTTTGGATTAA           | 60 °C x 55                                              |
|                                                      | Reverse*      | CAAACCTCACCTAACCTTTAAA            |                                                         |
|                                                      | Sequencing    | GTAGTGTTTTTTTTTTGGAT              |                                                         |
| <i>C14orf105</i>                                     | Forward*      | GTATTTATTTTTTTTAAAGGTAATTTAAG     | 59 °C x 55                                              |
|                                                      | Reverse       | CATACTAATTACCAAACTTTATTAATC       |                                                         |
|                                                      | Sequencing    | AAAAATTTATCCCCCA                  |                                                         |
| <i>KIF12</i>                                         | Forward       | GTAGAGTAGGATATGGAAGAA             | 60 °C x 55                                              |
|                                                      | Reverse*      | AATACCTCCTAACCAATTTATAC           |                                                         |
|                                                      | Sequencing    | TATTGTTGTTTATAGGGA                |                                                         |
| <i>MIA2</i>                                          | Forward       | GATAGAAAAAGGTAGTTATTAAGAG         | 55 °C x 5 ><br>52 °C x 5 ><br>49 °C x 5 ><br>46 °C x 45 |
|                                                      | Reverse*      | CTCTCCAAACACTTTATCAA              |                                                         |
|                                                      | Sequencing    | TAAATTTTATTTGGGA                  |                                                         |
| <i>PAX8</i>                                          | Forward*      | GGGATAAGATTGGGATAG                | 52 °C x 55                                              |
|                                                      | Reverse       | CAAACCTCATCCTTTACAC               |                                                         |
|                                                      | Sequencing    | AACCTCATCCTTTACACC                |                                                         |
| <i>SERPINA6</i>                                      | Forward*      | GATAAAGTTTTTTATTGGTTAATG          | 54 °C x 55                                              |
|                                                      | Reverse       | CCTAAACCCTAACATATATACA            |                                                         |
|                                                      | Sequencing    | CCTAAACCCTAACATATATACA            |                                                         |
| <i>SGK2</i>                                          | Forward       | ATTAGGGAAGGTTGTGTAG               | 57 °C x 5 ><br>55 °C x 5 ><br>53 °C x 50                |
|                                                      | Reverse*      | CAACTCCCTAAACCTCATATAAA           |                                                         |
|                                                      | Sequencing    | TTAGTATTTAAGTTGGATTTTG            |                                                         |
| <i>SRC</i>                                           | Forward       | GAATTTTTTGTGGTTATGTT              | 57 °C x 55                                              |
|                                                      | Reverse*      | ACAAAACCTTACTCTACACTAATCT         |                                                         |
|                                                      | Sequencing    | GAATTTTTTGTGGTTATG                |                                                         |
| <i>TM4SF4</i>                                        | Forward       | GTTAGATTAAGGTGTAGTGG              | 60 °C x 5 ><br>57 °C x 5 ><br>54 °C x 5 ><br>51 °C x 45 |
|                                                      | Reverse*      | ATTTATACATTCTCCCTAACCC            |                                                         |

|                               |            |                                   |                                                         |
|-------------------------------|------------|-----------------------------------|---------------------------------------------------------|
|                               | Sequencing | GTGTTGGTGGATTATTAATAG             |                                                         |
| <i>F2</i>                     | Forward    | GGATTTGTTTTTTTAGATGGT             | 60 °C x 55                                              |
|                               | Reverse*   | CTCCCTTACCATACTAACTATAACAC        |                                                         |
|                               | Sequencing | TTTTTAGATGGTGGAGA                 |                                                         |
| <i>ESR1</i>                   | Forward    | GATGTTTAAGTTAATGTTAGGGTAAGGTAATAG | 62 °C x 55                                              |
|                               | Reverse*   | AACCTCCAACCTTAAATACTAATCTC        |                                                         |
|                               | Sequencing | ATGTTAGGGTAAGGTAATAG              |                                                         |
| <i>BRCA1</i>                  | Forward    | GTATTTTGAGAGGTTGTTGTTTAG          | 70 °C x 5 ><br>68 °C x 5 ><br>66 °C x 5 ><br>64 °C x 45 |
|                               | Reverse*   | AAAACCCCACAACCTATCC               |                                                         |
|                               | Sequencing | TTTGAGAGGTTGTTGTTTA               |                                                         |
| <i>IGF2</i>                   | Forward    | GGAGGGGGTTTATTTTTTTAGGAAG         | 70 °C x 5 ><br>68 °C x 5 ><br>66 °C x 50                |
|                               | Reverse*   | AACCCCAACAAAACCACTAAACAC          |                                                         |
|                               | Sequencing | GGGGTTTATTTTTTTAGGA               |                                                         |
| * denotes biotinylated primer |            |                                   |                                                         |

**Supplementary Table 3** Differentially methylated genes between ovarian cancer cells and normal cells

|                                        | <b>50 cell lines (genes)</b> | <b>93 clinical samples (genes)</b> |
|----------------------------------------|------------------------------|------------------------------------|
| <b>Differentially methylated genes</b> | 2,003 / 14,495 (13.8%)       | 3,432 / 21,231 (16.2%)             |
| Hypermethylated genes                  | 1,870 (2,404 CpG sites)      | 2,383 (4,830 CpG sites)            |
| Hypomethylated genes                   | 139 (157 CpG sites)          | 1,253 (2,089 CpG sites)            |

**Supplementary Table 4a** Overlapping probes in cell lines and tissue specimens that are significantly hypermethylated in CCC.

| Probe ID   | Gene ID | Symbol    | CPG ISLAND | Average beta value difference in cell lines | Average beta value difference in tissues | ER pathway |
|------------|---------|-----------|------------|---------------------------------------------|------------------------------------------|------------|
| cg02104644 | 9066    | SYT7      | TRUE       | 0.2826                                      | 0.2220                                   |            |
| cg02927346 | 91608   | RASL10B   | TRUE       | 0.3962                                      | 0.2145                                   |            |
| cg03158400 | 54097   | FAM3B     | TRUE       | 0.3479                                      | 0.2041                                   |            |
| cg06339706 | 57664   | PLEKHA4   | FALSE      | 0.2617                                      | 0.2234                                   |            |
| cg07384961 | 9074    | CLDN6     | TRUE       | 0.2006                                      | 0.2439                                   |            |
| cg08725962 | 285598  | ARL10     | TRUE       | 0.4234                                      | 0.2791                                   |            |
| cg09715672 | 10974   | C10orf116 | TRUE       | 0.2884                                      | 0.2038                                   |            |
| cg09747578 | 10489   | LRRC41    | TRUE       | 0.2481                                      | 0.2070                                   |            |
| cg14377791 | 400696  | LOC400696 | FALSE      | 0.2789                                      | 0.2261                                   |            |
| cg14667273 | 64856   | VWA1      | TRUE       | 0.2345                                      | 0.2254                                   |            |
| cg17599586 | 23761   | PISD      | TRUE       | 0.3378                                      | 0.3007                                   |            |
| cg18702197 | 3232    | HOXD3     | TRUE       | 0.2456                                      | 0.2276                                   | yes        |
| cg18750960 | 3233    | HOXD4     | TRUE       | 0.3482                                      | 0.2292                                   | yes        |
| cg19257550 | 768     | CA9       | FALSE      | 0.3274                                      | 0.2628                                   |            |
| cg19718882 | 51352   | WIT-1     | TRUE       | 0.2721                                      | 0.2476                                   |            |
| cg20610181 | 768     | CA9       | FALSE      | 0.2151                                      | 0.2315                                   |            |
| cg21576698 | 7388    | UQCRH     | TRUE       | 0.4252                                      | 0.3183                                   |            |
| cg21949305 | 135     | ADORA2A   | FALSE      | 0.2369                                      | 0.2435                                   |            |
| cg22319147 | 1003    | CDH5      | FALSE      | 0.2063                                      | 0.2041                                   |            |
| cg22833027 | 8646    | CHRD      | TRUE       | 0.2201                                      | 0.2043                                   |            |
| cg23328404 | 55790   | ChGn      | FALSE      | 0.2344                                      | 0.2117                                   |            |
| cg24638647 | 84336   | TMEM101   | TRUE       | 0.5369                                      | 0.2012                                   |            |
| cg25228126 | 2535    | FZD2      | TRUE       | 0.2731                                      | 0.2384                                   |            |
| cg25229172 | 120935  | CCDC38    | TRUE       | 0.3337                                      | 0.2070                                   |            |
| cg27092035 | 285598  | ARL10     | TRUE       | 0.3797                                      | 0.2480                                   |            |

**Supplementary Table 4b** Overlapping probes in cell lines and tissue specimens that are significantly hypomethylated in CCC.

| Probe ID   | Gene ID | Symbol  | CPG ISLAND | Average beta value difference in cell lines | Average beta value difference in tissues | HNF1 pathway |
|------------|---------|---------|------------|---------------------------------------------|------------------------------------------|--------------|
| cg11286122 | 23187   | PHLDB1  | FALSE      | -0.3814                                     | -0.2729                                  |              |
| cg11964613 | 415     | ARSE    | FALSE      | -0.3942                                     | -0.2249                                  |              |
| cg17463527 | 10110   | SGK2    | FALSE      | -0.3234                                     | -0.2119                                  | yes          |
| cg20199333 | 2147    | F2      | FALSE      | -0.3332                                     | -0.2182                                  | yes          |
| cg21495715 | 125206  | SLC5A10 | TRUE       | -0.2791                                     | -0.2637                                  |              |
| cg24747122 | 10672   | GNA13   | FALSE      | -0.3507                                     | -0.3057                                  |              |

**Supplementary Table 5a** 276 genes (347 probes) identified as hypermethylated in CCC

| Probe ID   | Gene ID | Symbol   | CPG ISLAND | U133A2      | R value | P value |
|------------|---------|----------|------------|-------------|---------|---------|
| cg00186701 | 85453   | TSPYL5   | TRUE       | 213122 at   | -0.6196 | <0.0001 |
| cg00236832 | 5914    | RARA     | FALSE      | 203749 s at | -0.3750 | 0.0144  |
| cg00236832 | 5914    | RARA     | FALSE      | 211605 s at | -0.3625 | 0.0183  |
| cg00236832 | 5914    | RARA     | FALSE      | 216300 x at | -0.3136 | 0.0431  |
| cg00392257 | 81875   | ISG20L2  | FALSE      | 208114 s at | -0.4333 | 0.0042  |
| cg00392257 | 81875   | ISG20L2  | FALSE      | 212766 s at | -0.3081 | 0.0471  |
| cg00512374 | 3487    | IGFBP4   | TRUE       | 201508 at   | -0.6309 | <0.0001 |
| cg00513220 | 54996   | MOSC2    | TRUE       | 221636 s at | -0.4610 | 0.0021  |
| cg00513220 | 54996   | MOSC2    | TRUE       | 219527 at   | -0.4163 | 0.0061  |
| cg00564163 | 79689   | STEAP4   | TRUE       | 220187 at   | -0.4924 | 0.0009  |
| cg00655307 | 2099    | ESR1     | TRUE       | 205225 at   | -0.3903 | 0.0106  |
| cg00698688 | 6820    | SULT2B1  | FALSE      | 205759 s at | -0.5738 | 0.0001  |
| cg00702231 | 5325    | PLAGL1   | TRUE       | 207002 s at | -0.6817 | <0.0001 |
| cg00702231 | 5325    | PLAGL1   | TRUE       | 207943 x at | -0.6774 | <0.0001 |
| cg00702231 | 5325    | PLAGL1   | TRUE       | 209318 x at | -0.6589 | <0.0001 |
| cg00725635 | 8707    | B3GALT2  | FALSE      | 210121 at   | -0.3623 | 0.0184  |
| cg00931491 | 6799    | SULT1A2  | FALSE      | 207122 x at | -0.4855 | 0.0011  |
| cg00931491 | 6799    | SULT1A2  | FALSE      | 211385 x at | -0.4737 | 0.0015  |
| cg00980978 | 10406   | WFDC2    | TRUE       | 203892 at   | -0.5911 | <0.0001 |
| cg01062029 | 4920    | ROR2     | TRUE       | 205578 at   | -0.4273 | 0.0048  |
| cg01172484 | 28986   | MAGEH1   | TRUE       | 218573 at   | -0.5489 | 0.0002  |
| cg01240931 | 324     | APC      | FALSE      | 203525 s at | -0.4203 | 0.0056  |
| cg01240931 | 324     | APC      | FALSE      | 203527 s at | -0.3801 | 0.0130  |
| cg01240931 | 324     | APC      | FALSE      | 216933 x at | -0.3681 | 0.0165  |
| cg01240931 | 324     | APC      | FALSE      | 203526 s at | -0.3633 | 0.0180  |
| cg01283289 | 79611   | FLJ21963 | TRUE       | 219616 at   | -0.6246 | <0.0001 |
| cg01318557 | 7462    | LAT2     | TRUE       | 221581 s at | -0.4849 | 0.0011  |
| cg01420388 | 26232   | FBXO2    | TRUE       | 219305 x at | -0.6875 | <0.0001 |
| cg01593886 | 1277    | COL1A1   | TRUE       | 202310 s at | -0.4733 | 0.0015  |
| cg01593886 | 1277    | COL1A1   | TRUE       | 217430 x at | -0.3982 | 0.0090  |
| cg01593886 | 1277    | COL1A1   | TRUE       | 202311 s at | -0.3592 | 0.0195  |
| cg01615704 | 7851    | MALL     | TRUE       | 209373 at   | -0.5998 | <0.0001 |
| cg01657207 | 7584    | ZNF35    | FALSE      | 206096 at   | -0.6963 | <0.0001 |
| cg01705587 | 9900    | SV2A     | TRUE       | 203069 at   | -0.7719 | <0.0001 |
| cg01773854 | 3489    | IGFBP6   | TRUE       | 203851 at   | -0.5245 | 0.0004  |
| cg01795122 | 2014    | EMP3     | TRUE       | 203729 at   | -0.7410 | <0.0001 |
| cg01805282 | 2070    | EYA4     | TRUE       | 207327 at   | -0.4612 | 0.0021  |
| cg02000005 | 1396    | CRIP1    | TRUE       | 205081 at   | -0.7657 | <0.0001 |
| cg02175308 | 6272    | SORT1    | TRUE       | 212807 s at | -0.5740 | 0.0001  |
| cg02175308 | 6272    | SORT1    | TRUE       | 212797 at   | -0.5217 | 0.0004  |
| cg02189785 | 9022    | CLIC3    | TRUE       | 219529 at   | -0.6570 | <0.0001 |
| cg02257681 | 23564   | DDAH2    | TRUE       | 202262 x at | -0.6509 | <0.0001 |
| cg02257681 | 23564   | DDAH2    | TRUE       | 214909 s at | -0.6262 | <0.0001 |
| cg02257681 | 23564   | DDAH2    | TRUE       | 215537 x at | -0.6160 | <0.0001 |
| cg02265318 | 64757   | MOSC1    | TRUE       | 218865 at   | -0.6016 | <0.0001 |
| cg02286990 | 79140   | CCDC28B  | TRUE       | 221912 s at | -0.5174 | 0.0004  |
| cg02286990 | 79140   | CCDC28B  | TRUE       | 219585 at   | -0.3952 | 0.0096  |
| cg02497758 | 9935    | MAFB     | TRUE       | 218559 s at | -0.5279 | 0.0003  |
| cg02508567 | 83439   | TCF7L1   | TRUE       | 221016 s at | -0.5883 | <0.0001 |
| cg02586730 | 30008   | EFEMP2   | TRUE       | 209356 x at | -0.8761 | <0.0001 |
| cg02586730 | 30008   | EFEMP2   | TRUE       | 206580 s at | -0.8589 | <0.0001 |
| cg02622316 | 9753    | ZNF96    | TRUE       | 217098 s at | -0.7006 | <0.0001 |
| cg02622316 | 9753    | ZNF96    | TRUE       | 206507 at   | -0.5108 | 0.0005  |
| cg02672493 | 80723   | TMEM22   | TRUE       | 219569 s at | -0.6431 | <0.0001 |



|            |       |          |       |        |      |         |         |
|------------|-------|----------|-------|--------|------|---------|---------|
| cg02724472 | 10234 | LRRC17   | FALSE | 205381 | at   | -0.4122 | 0.0067  |
| cg02787991 | 6398  | SECTM1   | TRUE  | 213716 | s at | -0.4677 | 0.0018  |
| cg02833725 | 81875 | ISG20L2  | FALSE | 208114 | s at | -0.4060 | 0.0076  |
| cg03000846 | 5881  | RAC3     | TRUE  | 206103 | at   | -0.5581 | 0.0001  |
| cg03005261 | 55013 | FLJ20647 | TRUE  | 218802 | at   | -0.7221 | <0.0001 |
| cg03020951 | 3159  | HMGA1    | TRUE  | 210457 | x at | -0.3971 | 0.0092  |
| cg03020951 | 3159  | HMGA1    | TRUE  | 206074 | s at | -0.3269 | 0.0346  |
| cg03030757 | 2178  | FANCE    | TRUE  | 220255 | at   | -0.6148 | <0.0001 |
| cg03050522 | 9138  | ARHGEF1  | TRUE  | 203055 | s at | -0.4528 | 0.0026  |
| cg03070194 | 2946  | GSTM2    | FALSE | 204418 | x at | -0.5652 | 0.0001  |
| cg03201604 | 27163 | ASAH1    | TRUE  | 214765 | s at | -0.7533 | <0.0001 |
| cg03316864 | 10331 | B3GNT3   | TRUE  | 204856 | at   | -0.5613 | 0.0001  |
| cg03365354 | 4162  | MCAM     | TRUE  | 210869 | s at | -0.6013 | <0.0001 |
| cg03365354 | 4162  | MCAM     | TRUE  | 211340 | s at | -0.5861 | <0.0001 |
| cg03365354 | 4162  | MCAM     | TRUE  | 209087 | x at | -0.5720 | 0.0001  |
| cg03365354 | 4162  | MCAM     | TRUE  | 209086 | x at | -0.5045 | 0.0007  |
| cg03557733 | 4355  | MPP2     | TRUE  | 207984 | s at | -0.3071 | 0.0479  |
| cg03568064 | 9479  | MAPK8IP1 | TRUE  | 213013 | at   | -0.4297 | 0.0045  |
| cg03568064 | 9479  | MAPK8IP1 | TRUE  | 213014 | at   | -0.3374 | 0.0289  |
| cg03614513 | 10100 | TSPAN2   | TRUE  | 214606 | at   | -0.4071 | 0.0075  |
| cg03642357 | 157   | ADRBK2   | TRUE  | 204183 | s at | -0.3548 | 0.0211  |
| cg03642357 | 157   | ADRBK2   | TRUE  | 204184 | s at | -0.3120 | 0.0442  |
| cg03682712 | 4016  | LOXL1    | TRUE  | 203570 | at   | -0.7917 | <0.0001 |
| cg03691812 | 11151 | CORO1A   | TRUE  | 209083 | at   | -0.3862 | 0.0115  |
| cg03705396 | 79929 | MAP6D1   | TRUE  | 221713 | s at | -0.4775 | 0.0014  |
| cg03718539 | 55224 | ETNK2    | TRUE  | 219268 | at   | -0.4728 | 0.0016  |
| cg03740216 | 3386  | ICAM4    | TRUE  | 207194 | s at | -0.3733 | 0.0149  |
| cg03954173 | 976   | CD97     | FALSE | 202910 | s at | -0.7301 | <0.0001 |
| cg03985657 | 10712 | C1orf2   | TRUE  | 203550 | s at | -0.6605 | <0.0001 |
| cg04273431 | 80742 | PRR3     | TRUE  | 204795 | at   | -0.3334 | 0.0309  |
| cg04411625 | 1396  | CRIP1    | TRUE  | 205081 | at   | -0.6688 | <0.0001 |
| cg04444771 | 11067 | C10orf10 | FALSE | 209183 | s at | -0.4248 | 0.0050  |
| cg04444771 | 11067 | C10orf10 | FALSE | 209182 | s at | -0.3277 | 0.0341  |
| cg04544154 | 2000  | ELF4     | TRUE  | 203490 | at   | -0.4473 | 0.0030  |
| cg04544154 | 2000  | ELF4     | TRUE  | 31845  | at   | -0.4315 | 0.0043  |
| cg04676561 | 3009  | HIST1H1B | TRUE  | 214534 | at   | -0.6048 | <0.0001 |
| cg04736140 | 23432 | GPR161   | TRUE  | 214104 | at   | -0.3356 | 0.0298  |
| cg04736140 | 23432 | GPR161   | TRUE  | 206972 | s at | -0.3149 | 0.0422  |
| cg04743872 | 55022 | FLJ20701 | TRUE  | 219093 | at   | -0.5608 | 0.0001  |
| cg04797323 | 8835  | SOCS2    | TRUE  | 203372 | s at | -0.3437 | 0.0259  |
| cg04797323 | 8835  | SOCS2    | TRUE  | 203373 | at   | -0.3059 | 0.0488  |
| cg04809787 | 1140  | CHRN1    | TRUE  | 206703 | at   | -0.6730 | <0.0001 |
| cg04870470 | 2135  | EXTL2    | FALSE | 209537 | at   | -0.5646 | 0.0001  |
| cg04947157 | 11322 | TMC6     | TRUE  | 204328 | at   | -0.5990 | <0.0001 |
| cg04947157 | 11322 | TMC6     | TRUE  | 214958 | s at | -0.5308 | 0.0003  |
| cg05026186 | 22885 | ABLIM3   | TRUE  | 205730 | s at | -0.4639 | 0.0020  |
| cg05270634 | 8153  | RND2     | TRUE  | 213467 | at   | -0.6852 | <0.0001 |
| cg05361373 | 29108 | PYCARD   | TRUE  | 221666 | s at | -0.9349 | <0.0001 |
| cg05600717 | 79758 | FLJ13639 | TRUE  | 204800 | s at | -0.3800 | 0.0131  |
| cg05659947 | 725   | C4BPB    | FALSE | 208209 | s at | -0.5477 | 0.0002  |
| cg05677402 | 9246  | UBE2L6   | TRUE  | 201649 | at   | -0.6704 | <0.0001 |
| cg05932408 | 5740  | PTGIS    | TRUE  | 208131 | s at | -0.3109 | 0.0451  |
| cg06030619 | 11151 | CORO1A   | TRUE  | 209083 | at   | -0.4037 | 0.0080  |
| cg06043114 | 10100 | TSPAN2   | TRUE  | 214606 | at   | -0.4301 | 0.0045  |
| cg06100324 | 10232 | MSLN     | FALSE | 204885 | s at | -0.7830 | <0.0001 |
| cg06111454 | 4776  | NFATC4   | FALSE | 213345 | at   | -0.3620 | 0.0185  |
| cg06189653 | 80758 | PRR7     | TRUE  | 219742 | at   | -0.4099 | 0.0070  |
| cg06191076 | 9077  | DIRAS3   | TRUE  | 215506 | s at | -0.3519 | 0.0223  |
| cg06207804 | 9048  | ARTN     | TRUE  | 207675 | x at | -0.4670 | 0.0018  |
| cg06207804 | 9048  | ARTN     | TRUE  | 216052 | x at | -0.4214 | 0.0055  |
| cg06207804 | 9048  | ARTN     | TRUE  | 210237 | at   | -0.4127 | 0.0066  |

|            |       |          |       |             |         |         |
|------------|-------|----------|-------|-------------|---------|---------|
| cg06221259 | 51308 | REEP2    | TRUE  | 205331 s at | -0.6049 | <0.0001 |
| cg06311778 | 23371 | TENC1    | TRUE  | 212494 at   | -0.4391 | 0.0036  |
| cg06339706 | 57664 | PLEKHA4  | FALSE | 219011 at   | -0.3338 | 0.0307  |
| cg06409153 | 23461 | ABCA5    | TRUE  | 213353 at   | -0.5122 | 0.0005  |
| cg06432655 | 25999 | CLIPR-59 | FALSE | 212358 at   | -0.7207 | <0.0001 |
| cg06791102 | 393   | ARHGAP4  | TRUE  | 204425 at   | -0.8570 | <0.0001 |
| cg06885524 | 79901 | CYBRD1   | TRUE  | 217889 s at | -0.6701 | <0.0001 |
| cg06894812 | 4163  | MCC      | TRUE  | 206132 at   | -0.4460 | 0.0031  |
| cg06912252 | 84302 | C9orf125 | TRUE  | 213386 at   | -0.5266 | 0.0003  |
| cg07005513 | 9415  | FADS2    | TRUE  | 202218 s at | -0.5637 | 0.0001  |
| cg07077459 | 5325  | PLAGL1   | TRUE  | 207002 s at | -0.6973 | <0.0001 |
| cg07077459 | 5325  | PLAGL1   | TRUE  | 207943 x at | -0.6927 | <0.0001 |
| cg07077459 | 5325  | PLAGL1   | TRUE  | 209318 x at | -0.6740 | <0.0001 |
| cg07112154 | 4355  | MPP2     | TRUE  | 207984 s at | -0.3466 | 0.0245  |
| cg07112154 | 4355  | MPP2     | TRUE  | 213270 at   | -0.3058 | 0.0489  |
| cg07123069 | 3227  | HOXC11   | TRUE  | 206745 at   | -0.7091 | <0.0001 |
| cg07138512 | 5909  | RAP1GA1  | TRUE  | 203911 at   | -0.3206 | 0.0384  |
| cg07200280 | 23180 | RAFTLIN  | TRUE  | 212646 at   | -0.5676 | 0.0001  |
| cg07211259 | 80380 | PDCD1LG2 | FALSE | 220049 s at | -0.6064 | <0.0001 |
| cg07294541 | 50619 | DEF6     | TRUE  | 221293 s at | -0.5538 | 0.0001  |
| cg07307078 | 84617 | TUBB6    | TRUE  | 209191 at   | -0.3321 | 0.0316  |
| cg07327468 | 2070  | EYA4     | TRUE  | 207327 at   | -0.4436 | 0.0033  |
| cg07328579 | 83468 | GLT8D2   | TRUE  | 221447 s at | -0.4901 | 0.0010  |
| cg07384961 | 9074  | CLDN6    | TRUE  | 208474 at   | -0.7665 | <0.0001 |
| cg07440414 | 6932  | TCF7     | TRUE  | 205255 x at | -0.4826 | 0.0012  |
| cg07440414 | 6932  | TCF7     | TRUE  | 205254 x at | -0.4751 | 0.0015  |
| cg07602200 | 5027  | P2RX7    | TRUE  | 207091 at   | -0.4331 | 0.0042  |
| cg07611334 | 80023 | C20orf98 | TRUE  | 218359 at   | -0.7271 | <0.0001 |
| cg07640473 | 6405  | SEMA3F   | TRUE  | 206832 s at | -0.6499 | <0.0001 |
| cg07640473 | 6405  | SEMA3F   | TRUE  | 35666 at    | -0.5823 | 0.0001  |
| cg07640473 | 6405  | SEMA3F   | TRUE  | 209730 at   | -0.4506 | 0.0027  |
| cg07660236 | 9753  | ZNF96    | TRUE  | 217098 s at | -0.6258 | <0.0001 |
| cg07660236 | 9753  | ZNF96    | TRUE  | 206507 at   | -0.4264 | 0.0049  |
| cg07895149 | 51063 | FAM26B   | TRUE  | 57715 at    | -0.7407 | <0.0001 |
| cg07895149 | 51063 | FAM26B   | TRUE  | 221565 s at | -0.7360 | <0.0001 |
| cg08052882 | 23530 | NNT      | FALSE | 202784 s at | -0.7079 | <0.0001 |
| cg08052882 | 23530 | NNT      | FALSE | 202783 at   | -0.7076 | <0.0001 |
| cg08317263 | 26112 | CCDC69   | TRUE  | 212886 at   | -0.3083 | 0.0470  |
| cg08432727 | 6664  | SOX11    | TRUE  | 204914 s at | -0.5841 | <0.0001 |
| cg08432727 | 6664  | SOX11    | TRUE  | 204913 s at | -0.5496 | 0.0002  |
| cg08432727 | 6664  | SOX11    | TRUE  | 204915 s at | -0.5084 | 0.0006  |
| cg08441170 | 53904 | MYO3A    | TRUE  | 221400 at   | -0.5064 | 0.0006  |
| cg08496601 | 10682 | EBP      | TRUE  | 213787 s at | -0.7092 | <0.0001 |
| cg08496601 | 10682 | EBP      | TRUE  | 202735 at   | -0.6932 | <0.0001 |
| cg08590939 | 5019  | OXCT1    | TRUE  | 202780 at   | -0.6915 | <0.0001 |
| cg08629913 | 3489  | IGFBP6   | TRUE  | 203851 at   | -0.5005 | 0.0007  |
| cg08655844 | 81552 | ECOP     | TRUE  | 208091 s at | -0.3053 | 0.0493  |
| cg08713365 | 80023 | C20orf98 | TRUE  | 218359 at   | -0.7053 | <0.0001 |
| cg08955609 | 348   | APOE     | TRUE  | 203381 s at | -0.4138 | 0.0064  |
| cg08955609 | 348   | APOE     | TRUE  | 212884 x at | -0.3521 | 0.0222  |
| cg08955609 | 348   | APOE     | TRUE  | 203382 s at | -0.3339 | 0.0307  |
| cg08965235 | 4054  | LTBP3    | TRUE  | 219922 s at | -0.6006 | <0.0001 |
| cg09001777 | 2525  | FUT3     | FALSE | 214088 s at | -0.6803 | <0.0001 |
| cg09001777 | 2525  | FUT3     | FALSE | 216010 x at | -0.6750 | <0.0001 |
| cg09208010 | 4323  | MMP14    | TRUE  | 202827 s at | -0.5983 | <0.0001 |
| cg09208010 | 4323  | MMP14    | TRUE  | 202828 s at | -0.5480 | 0.0002  |
| cg09208010 | 4323  | MMP14    | TRUE  | 160020 at   | -0.5321 | 0.0003  |
| cg09208010 | 4323  | MMP14    | TRUE  | 217279 x at | -0.4454 | 0.0031  |
| cg09243900 | 57111 | RAB25    | FALSE | 218186 at   | -0.9321 | <0.0001 |
| cg09405083 | 54838 | C10orf26 | FALSE | 202808 at   | -0.4065 | 0.0076  |
| cg09580336 | 476   | ATP1A1   | TRUE  | 220948 s at | -0.4973 | 0.0008  |

|            |       |           |       |             |         |         |
|------------|-------|-----------|-------|-------------|---------|---------|
| cg09619786 | 54913 | RPP25     | TRUE  | 219143 s at | -0.6187 | <0.0001 |
| cg09715672 | 10974 | C10orf116 | TRUE  | 203571 s at | -0.8742 | <0.0001 |
| cg09747578 | 10489 | LRRC41    | TRUE  | 201932 at   | -0.4973 | 0.0008  |
| cg09747578 | 10489 | LRRC41    | TRUE  | 215765 at   | -0.4163 | 0.0061  |
| cg09786221 | 10398 | MYL9      | TRUE  | 201058 s at | -0.7382 | <0.0001 |
| cg09906488 | 57118 | CAMK1D    | TRUE  | 220246 at   | -0.5089 | 0.0006  |
| cg09998229 | 6915  | TBXA2R    | TRUE  | 336 at      | -0.3615 | 0.0187  |
| cg10084993 | 9351  | SLC9A3R2  | FALSE | 209830 s at | -0.5323 | 0.0003  |
| cg10107725 | 4065  | LY75      | TRUE  | 205668 at   | -0.6306 | <0.0001 |
| cg10449070 | 217   | ALDH2     | TRUE  | 201425 at   | -0.6293 | <0.0001 |
| cg10516359 | 55343 | SLC35C1   | TRUE  | 218485 s at | -0.3283 | 0.0338  |
| cg10519140 | 2030  | SLC29A1   | TRUE  | 201802 at   | -0.4493 | 0.0028  |
| cg10519140 | 2030  | SLC29A1   | TRUE  | 201801 s at | -0.4144 | 0.0064  |
| cg10520594 | 30833 | NT5C      | TRUE  | 219214 s at | -0.7350 | <0.0001 |
| cg10521852 | 9170  | EDG4      | TRUE  | 206722 s at | -0.6107 | <0.0001 |
| cg10521852 | 9170  | EDG4      | TRUE  | 206723 s at | -0.5801 | 0.0001  |
| cg10541755 | 56648 | EIF5A2    | TRUE  | 220198 s at | -0.4680 | 0.0018  |
| cg10557828 | 5352  | PLOD2     | TRUE  | 202619 s at | -0.5828 | 0.0001  |
| cg10557828 | 5352  | PLOD2     | TRUE  | 202620 s at | -0.5665 | 0.0001  |
| cg10564498 | 558   | AXL       | TRUE  | 202686 s at | -0.5775 | 0.0001  |
| cg10564498 | 558   | AXL       | TRUE  | 202685 s at | -0.4485 | 0.0029  |
| cg10599444 | 4323  | MMP14     | TRUE  | 202827 s at | -0.5723 | 0.0001  |
| cg10599444 | 4323  | MMP14     | TRUE  | 202828 s at | -0.5311 | 0.0003  |
| cg10599444 | 4323  | MMP14     | TRUE  | 160020 at   | -0.5046 | 0.0007  |
| cg10599444 | 4323  | MMP14     | TRUE  | 217279 x at | -0.4097 | 0.0071  |
| cg10617171 | 6324  | SCN1B     | TRUE  | 205508 at   | -0.3184 | 0.0399  |
| cg10670077 | 3643  | INSR      | TRUE  | 213792 s at | -0.4016 | 0.0084  |
| cg10682057 | 27163 | ASAHL     | TRUE  | 214765 s at | -0.6702 | <0.0001 |
| cg10731149 | 79901 | CYBRD1    | TRUE  | 217889 s at | -0.6959 | <0.0001 |
| cg10743104 | 10630 | PDPN      | TRUE  | 221898 at   | -0.4221 | 0.0054  |
| cg10743104 | 10630 | PDPN      | TRUE  | 204879 at   | -0.3398 | 0.0277  |
| cg10778619 | 27345 | KCNMB4    | TRUE  | 219287 at   | -0.3531 | 0.0218  |
| cg10857774 | 1760  | DMPK      | FALSE | 37996 s at  | -0.3411 | 0.0271  |
| cg10857774 | 1760  | DMPK      | FALSE | 217066 s at | -0.3270 | 0.0345  |
| cg10983208 | 9806  | SPOCK2    | TRUE  | 202524 s at | -0.7936 | <0.0001 |
| cg10983208 | 9806  | SPOCK2    | TRUE  | 202523 s at | -0.7201 | <0.0001 |
| cg10995380 | 7041  | TGFB111   | TRUE  | 209651 at   | -0.4626 | 0.0020  |
| cg11059483 | 2100  | ESR2      | TRUE  | 211119 at   | -0.4102 | 0.0070  |
| cg11200929 | 1381  | CRABP1    | TRUE  | 205350 at   | -0.3814 | 0.0127  |
| cg11204562 | 79949 | C10orf81  | FALSE | 219857 at   | -0.3941 | 0.0098  |
| cg11271605 | 79689 | STEAP4    | TRUE  | 220187 at   | -0.3398 | 0.0277  |
| cg11612291 | 7584  | ZNF35     | TRUE  | 206096 at   | -0.7053 | <0.0001 |
| cg11745019 | 284   | ANGPT1    | TRUE  | 205608 s at | -0.3188 | 0.0396  |
| cg11745019 | 284   | ANGPT1    | TRUE  | 205609 at   | -0.3188 | 0.0396  |
| cg11783497 | 3557  | IL1RN     | FALSE | 212657 s at | -0.4367 | 0.0038  |
| cg11783497 | 3557  | IL1RN     | FALSE | 216243 s at | -0.4271 | 0.0048  |
| cg11783497 | 3557  | IL1RN     | FALSE | 212659 s at | -0.3860 | 0.0116  |
| cg11840540 | 53827 | FXYD5     | TRUE  | 218084 x at | -0.3959 | 0.0095  |
| cg11935147 | 9659  | PDE4DIP   | TRUE  | 210305 at   | -0.3776 | 0.0137  |
| cg11935147 | 9659  | PDE4DIP   | TRUE  | 209700 x at | -0.3556 | 0.0208  |
| cg11970458 | 29108 | PYCARD    | TRUE  | 221666 s at | -0.8427 | <0.0001 |
| cg11976166 | 7042  | TGFB2     | TRUE  | 209909 s at | -0.6238 | <0.0001 |
| cg11976166 | 7042  | TGFB2     | TRUE  | 220407 s at | -0.6125 | <0.0001 |
| cg11976166 | 7042  | TGFB2     | TRUE  | 209908 s at | -0.5418 | 0.0002  |
| cg12220493 | 7080  | TITF1     | TRUE  | 211024 s at | -0.4306 | 0.0044  |
| cg12275348 | 8835  | SOCS2     | TRUE  | 203372 s at | -0.4114 | 0.0068  |
| cg12275348 | 8835  | SOCS2     | TRUE  | 203373 at   | -0.3803 | 0.0130  |
| cg12412075 | 64130 | LIN7B     | TRUE  | 219760 at   | -0.3146 | 0.0424  |
| cg12438034 | 64110 | MAGEF1    | TRUE  | 218176 at   | -0.4304 | 0.0044  |
| cg12556134 | 60436 | TGIF2     | TRUE  | 218724 s at | -0.5367 | 0.0002  |
| cg12556134 | 60436 | TGIF2     | TRUE  | 216262 s at | -0.5120 | 0.0005  |

|            |        |          |       |             |         |         |
|------------|--------|----------|-------|-------------|---------|---------|
| cg12592716 | 8454   | CUL1     | TRUE  | 207614 s at | -0.3657 | 0.0173  |
| cg12603043 | 30846  | EHD2     | TRUE  | 45297 at    | -0.7284 | <0.0001 |
| cg12603043 | 30846  | EHD2     | TRUE  | 221870 at   | -0.6951 | <0.0001 |
| cg12603043 | 30846  | EHD2     | TRUE  | 205341 at   | -0.5009 | 0.0007  |
| cg12621514 | 22943  | DKK1     | TRUE  | 204602 at   | -0.5797 | 0.0001  |
| cg12691219 | 51566  | ARMCX3   | TRUE  | 217858 s at | -0.7112 | <0.0001 |
| cg12757684 | 5325   | PLAGL1   | TRUE  | 207002 s at | -0.7103 | <0.0001 |
| cg12757684 | 5325   | PLAGL1   | TRUE  | 207943 x at | -0.7049 | <0.0001 |
| cg12757684 | 5325   | PLAGL1   | TRUE  | 209318 x at | -0.6886 | <0.0001 |
| cg12910797 | 3213   | HOXB3    | TRUE  | 208414 s at | -0.5578 | 0.0001  |
| cg12970084 | 1999   | ELF3     | FALSE | 201510 at   | -0.4743 | 0.0015  |
| cg12970084 | 1999   | ELF3     | FALSE | 210827 s at | -0.3893 | 0.0108  |
| cg12992720 | 9170   | EDG4     | TRUE  | 206722 s at | -0.7230 | <0.0001 |
| cg12992720 | 9170   | EDG4     | TRUE  | 206723 s at | -0.7106 | <0.0001 |
| cg13098960 | 6665   | SOX15    | FALSE | 206122 at   | -0.3849 | 0.0118  |
| cg13302154 | 4256   | MGP      | FALSE | 202291 s at | -0.3127 | 0.0438  |
| cg13340269 | 59353  | TMEM35   | TRUE  | 219685 at   | -0.5511 | 0.0002  |
| cg13353683 | 284119 | PTRF     | TRUE  | 208789 at   | -0.6925 | <0.0001 |
| cg13353683 | 284119 | PTRF     | TRUE  | 208790 s at | -0.6250 | <0.0001 |
| cg13376158 | 30833  | NT5C     | TRUE  | 219214 s at | -0.5930 | <0.0001 |
| cg13435381 | 8549   | LGR5     | TRUE  | 213880 at   | -0.3697 | 0.0160  |
| cg13496736 | 5017   | OVOL1    | TRUE  | 206604 at   | -0.4072 | 0.0074  |
| cg13523557 | 107    | ADCY1    | TRUE  | 213245 at   | -0.3277 | 0.0341  |
| cg13704271 | 79140  | CCDC28B  | TRUE  | 221912 s at | -0.5012 | 0.0007  |
| cg13704271 | 79140  | CCDC28B  | TRUE  | 219585 at   | -0.4241 | 0.0051  |
| cg13828758 | 4692   | NDN      | TRUE  | 209550 at   | -0.4724 | 0.0016  |
| cg13877915 | 7691   | ZNF132   | TRUE  | 207402 at   | -0.6607 | <0.0001 |
| cg13951472 | 11135  | CDC42EP1 | TRUE  | 204693 at   | -0.6746 | <0.0001 |
| cg14030359 | 57447  | NDRG2    | TRUE  | 214279 s at | -0.5189 | 0.0004  |
| cg14030359 | 57447  | NDRG2    | TRUE  | 206453 s at | -0.4174 | 0.0060  |
| cg14070162 | 284119 | PTRF     | TRUE  | 208789 at   | -0.7058 | <0.0001 |
| cg14070162 | 284119 | PTRF     | TRUE  | 208790 s at | -0.6457 | <0.0001 |
| cg14072120 | 5880   | RAC2     | TRUE  | 213603 s at | -0.7513 | <0.0001 |
| cg14072120 | 5880   | RAC2     | TRUE  | 207419 s at | -0.7024 | <0.0001 |
| cg14310034 | 652    | BMP4     | TRUE  | 211518 s at | -0.4575 | 0.0023  |
| cg14417329 | 9123   | SLC16A3  | TRUE  | 202856 s at | -0.3656 | 0.0173  |
| cg14417329 | 9123   | SLC16A3  | TRUE  | 202855 s at | -0.3630 | 0.0181  |
| cg14435807 | 4016   | LOXL1    | TRUE  | 203570 at   | -0.7842 | <0.0001 |
| cg14473924 | 23024  | PDZRN3   | TRUE  | 212915 at   | -0.3727 | 0.0151  |
| cg14564494 | 874    | CBR3     | FALSE | 205379 at   | -0.3551 | 0.0210  |
| cg14566624 | 387509 | GPR153   | TRUE  | 221902 at   | -0.3740 | 0.0147  |
| cg14679587 | 27165  | GLS2     | TRUE  | 205531 s at | -0.5542 | 0.0001  |
| cg14764661 | 9902   | MRC2     | FALSE | 37408 at    | -0.4973 | 0.0008  |
| cg14833385 | 3108   | HLA-DMA  | FALSE | 217478 s at | -0.5309 | 0.0003  |
| cg14960043 | 50619  | DEF6     | TRUE  | 221293 s at | -0.5705 | 0.0001  |
| cg15009813 | 8742   | TNFSF12  | FALSE | 205611 at   | -0.4258 | 0.0049  |
| cg15014458 | 27076  | LYPD3    | FALSE | 204952 at   | -0.3457 | 0.0249  |
| cg15020645 | 324    | APC      | FALSE | 203525 s at | -0.3725 | 0.0151  |
| cg15020645 | 324    | APC      | FALSE | 203526 s at | -0.3080 | 0.0472  |
| cg15227982 | 54838  | C10orf26 | FALSE | 202808 at   | -0.3647 | 0.0176  |
| cg15247144 | 29108  | PYCARD   | TRUE  | 221666 s at | -0.9040 | <0.0001 |
| cg15309236 | 80823  | BHLHB9   | TRUE  | 213709 at   | -0.6398 | <0.0001 |
| cg15379633 | 9609   | RAB36    | TRUE  | 211471 s at | -0.6632 | <0.0001 |
| cg15387123 | 9022   | CLIC3    | TRUE  | 219529 at   | -0.7213 | <0.0001 |
| cg15426734 | 50855  | PARD6A   | TRUE  | 205245 at   | -0.4379 | 0.0037  |
| cg15526708 | 7046   | TGFBR1   | TRUE  | 206943 at   | -0.3938 | 0.0099  |
| cg15536490 | 7022   | TFAP2C   | TRUE  | 205286 at   | -0.3369 | 0.0291  |
| cg15536490 | 7022   | TFAP2C   | TRUE  | 205287 s at | -0.3259 | 0.0352  |
| cg15640375 | 79948  | PRG2     | TRUE  | 220798 x at | -0.4070 | 0.0075  |
| cg15684563 | 7103   | TSPAN8   | FALSE | 203824 at   | -0.5361 | 0.0003  |
| cg15747595 | 85453  | TSPYL5   | TRUE  | 213122 at   | -0.8511 | <0.0001 |

|            |        |          |       |             |         |         |
|------------|--------|----------|-------|-------------|---------|---------|
| cg15760840 | 3207   | HOXA11   | TRUE  | 208493 at   | -0.4411 | 0.0035  |
| cg15760840 | 3207   | HOXA11   | TRUE  | 213823 at   | -0.4036 | 0.0080  |
| cg15853125 | 7074   | TIAM1    | TRUE  | 213135 at   | -0.3294 | 0.0331  |
| cg15861540 | 6915   | TBXA2R   | TRUE  | 336 at      | -0.3608 | 0.0189  |
| cg16077929 | 8814   | CDKL1    | FALSE | 207766 at   | -0.4659 | 0.0019  |
| cg16080552 | 4070   | TACSTD2  | TRUE  | 202286 s at | -0.8576 | <0.0001 |
| cg16080552 | 4070   | TACSTD2  | TRUE  | 202287 s at | -0.3967 | 0.0093  |
| cg16092786 | 7490   | WT1      | TRUE  | 216953 s at | -0.3714 | 0.0155  |
| cg16227684 | 2664   | GDI1     | TRUE  | 201864 at   | -0.3349 | 0.0302  |
| cg16500334 | 6612   | SUMO3    | TRUE  | 200739 s at | -0.5857 | <0.0001 |
| cg16500334 | 6612   | SUMO3    | TRUE  | 200740 s at | -0.5796 | 0.0001  |
| cg16786703 | 101    | ADAM8    | TRUE  | 205179 s at | -0.4750 | 0.0015  |
| cg16786703 | 101    | ADAM8    | TRUE  | 205180 s at | -0.4283 | 0.0047  |
| cg16792632 | 2100   | ESR2     | TRUE  | 211119 at   | -0.3629 | 0.0182  |
| cg16914151 | 54913  | RPP25    | TRUE  | 219143 s at | -0.5218 | 0.0004  |
| cg16970232 | 324    | APC      | TRUE  | 203525 s at | -0.3487 | 0.0236  |
| cg17114257 | 9873   | FCHSD2   | TRUE  | 203620 s at | -0.3090 | 0.0465  |
| cg17285325 | 1890   | ECGF1    | TRUE  | 217497 at   | -0.3395 | 0.0278  |
| cg17285325 | 1890   | ECGF1    | TRUE  | 204858 s at | -0.3271 | 0.0345  |
| cg17441778 | 4647   | MYO7A    | TRUE  | 33197 at    | -0.3315 | 0.0320  |
| cg17470697 | 219654 | C10orf56 | TRUE  | 212423 at   | -0.3648 | 0.0175  |
| cg17501569 | 10232  | MSLN     | TRUE  | 204885 s at | -0.8413 | <0.0001 |
| cg17503456 | 668    | FOXL2    | TRUE  | 220102 at   | -0.5848 | <0.0001 |
| cg17550582 | 81031  | SLC2A10  | TRUE  | 221024 s at | -0.6575 | <0.0001 |
| cg17682828 | 53822  | FXYD7    | TRUE  | 220131 at   | -0.3210 | 0.0382  |
| cg17691309 | 7169   | TPM2     | TRUE  | 204083 s at | -0.7812 | <0.0001 |
| cg17691309 | 7169   | TPM2     | TRUE  | 212654 at   | -0.5821 | 0.0001  |
| cg17787710 | 5881   | RAC3     | TRUE  | 206103 at   | -0.4671 | 0.0018  |
| cg17800442 | 1489   | CTF1     | TRUE  | 206813 at   | -0.4524 | 0.0026  |
| cg17805404 | 27239  | GPR162   | FALSE | 205056 s at | -0.6196 | <0.0001 |
| cg17980508 | 10964  | IFI44L   | FALSE | 204439 at   | -0.3572 | 0.0202  |
| cg18265887 | 5880   | RAC2     | TRUE  | 213603 s at | -0.7971 | <0.0001 |
| cg18265887 | 5880   | RAC2     | TRUE  | 207419 s at | -0.7499 | <0.0001 |
| cg18273501 | 51063  | FAM26B   | TRUE  | 221565 s at | -0.7453 | <0.0001 |
| cg18273501 | 51063  | FAM26B   | TRUE  | 57715 at    | -0.7400 | <0.0001 |
| cg18702197 | 3232   | HOXD3    | TRUE  | 206602 s at | -0.4175 | 0.0059  |
| cg18702197 | 3232   | HOXD3    | TRUE  | 206601 s at | -0.3835 | 0.0122  |
| cg18727700 | 27286  | SRPX2    | FALSE | 205499 at   | -0.5674 | 0.0001  |
| cg18750960 | 3233   | HOXD4    | TRUE  | 205522 at   | -0.5424 | 0.0002  |
| cg18884137 | 1140   | CHRNB1   | TRUE  | 206703 at   | -0.6573 | <0.0001 |
| cg18937321 | 6536   | SLC6A9   | TRUE  | 207043 s at | -0.5411 | 0.0002  |
| cg18950617 | 23526  | HMHA1    | TRUE  | 212873 at   | -0.3081 | 0.0471  |
| cg19008649 | 3488   | IGFBP5   | TRUE  | 211959 at   | -0.3880 | 0.0111  |
| cg19038540 | 1901   | EDG1     | TRUE  | 204642 at   | -0.3515 | 0.0225  |
| cg19055639 | 9823   | ARMCX2   | TRUE  | 203404 at   | -0.6104 | <0.0001 |
| cg19186356 | 217    | ALDH2    | TRUE  | 201425 at   | -0.4215 | 0.0054  |
| cg19257550 | 768    | CA9      | FALSE | 205199 at   | -0.5935 | <0.0001 |
| cg19481953 | 27286  | SRPX2    | FALSE | 205499 at   | -0.5532 | 0.0001  |
| cg19514469 | 79767  | ELMO3    | TRUE  | 219411 at   | -0.8847 | <0.0001 |
| cg19614321 | 9770   | RASSF2   | FALSE | 203185 at   | -0.3217 | 0.0378  |
| cg19713460 | 9145   | SYNGR1   | TRUE  | 210613 s at | -0.5852 | <0.0001 |
| cg19713460 | 9145   | SYNGR1   | TRUE  | 213854 at   | -0.5836 | <0.0001 |
| cg19713460 | 9145   | SYNGR1   | TRUE  | 204287 at   | -0.5521 | 0.0002  |
| cg19744952 | 23152  | CIC      | TRUE  | 212784 at   | -0.3075 | 0.0476  |
| cg19764436 | 2781   | GNAZ     | TRUE  | 204993 at   | -0.5165 | 0.0005  |
| cg19786920 | 79730  | FLJ14001 | TRUE  | 220194 at   | -0.4819 | 0.0012  |
| cg19826026 | 397    | ARHGDIB  | FALSE | 201288 at   | -0.5869 | <0.0001 |
| cg19928046 | 972    | CD74     | FALSE | 209619 at   | -0.7322 | <0.0001 |
| cg20008332 | 6664   | SOX11    | TRUE  | 204914 s at | -0.6606 | <0.0001 |
| cg20008332 | 6664   | SOX11    | TRUE  | 204913 s at | -0.6491 | <0.0001 |
| cg20008332 | 6664   | SOX11    | TRUE  | 204915 s at | -0.5964 | <0.0001 |

|            |        |            |       |             |         |         |
|------------|--------|------------|-------|-------------|---------|---------|
| cg20311501 | 324    | APC        | TRUE  | 203525 s at | -0.3434 | 0.0260  |
| cg20330472 | 2070   | EYA4       | TRUE  | 207327 at   | -0.3901 | 0.0107  |
| cg20442697 | 10234  | LRRC17     | FALSE | 205381 at   | -0.3918 | 0.0103  |
| cg20484352 | 92689  | LOC92689   | TRUE  | 213455 at   | -0.6970 | <0.0001 |
| cg20610181 | 768    | CA9        | FALSE | 205199 at   | -0.5657 | 0.0001  |
| cg20627916 | 2099   | ESR1       | TRUE  | 205225 at   | -0.5442 | 0.0002  |
| cg20627916 | 2099   | ESR1       | TRUE  | 215552 s at | -0.4419 | 0.0034  |
| cg20627916 | 2099   | ESR1       | TRUE  | 217190 x at | -0.3686 | 0.0163  |
| cg20718816 | 4053   | LTBP2      | TRUE  | 204682 at   | -0.4225 | 0.0053  |
| cg20775959 | 9915   | ARNT2      | TRUE  | 202986 at   | -0.6756 | <0.0001 |
| cg20786074 | 2202   | EFEMP1     | TRUE  | 201843 s at | -0.4575 | 0.0023  |
| cg20786074 | 2202   | EFEMP1     | TRUE  | 201842 s at | -0.4339 | 0.0041  |
| cg20877313 | 27165  | GLS2       | TRUE  | 205531 s at | -0.5435 | 0.0002  |
| cg20908204 | 1760   | DMPK       | FALSE | 37996 s at  | -0.3669 | 0.0168  |
| cg20909686 | 5017   | OVOL1      | TRUE  | 206604 at   | -0.4542 | 0.0025  |
| cg20947775 | 79966  | SCD5       | TRUE  | 220232 at   | -0.3143 | 0.0426  |
| cg21012874 | 6623   | SNCG       | TRUE  | 209877 at   | -0.6944 | <0.0001 |
| cg21034676 | 7045   | TGFBI      | TRUE  | 201506 at   | -0.4340 | 0.0041  |
| cg21279955 | 11000  | SLC27A3    | TRUE  | 222217 s at | -0.6732 | <0.0001 |
| cg21522303 | 10610  | ST6GALNAC2 | TRUE  | 204542 at   | -0.5872 | <0.0001 |
| cg21572316 | 19     | ABCA1      | TRUE  | 203504 s at | -0.5591 | 0.0001  |
| cg21572316 | 19     | ABCA1      | TRUE  | 203505 at   | -0.5472 | 0.0002  |
| cg21572316 | 19     | ABCA1      | TRUE  | 216066 at   | -0.3344 | 0.0304  |
| cg21576698 | 7388   | UQCRH      | TRUE  | 202233 s at | -0.8685 | <0.0001 |
| cg21634602 | 324    | APC        | TRUE  | 203525 s at | -0.3404 | 0.0274  |
| cg21671476 | 10398  | MYL9       | TRUE  | 201058 s at | -0.8149 | <0.0001 |
| cg21838334 | 10763  | NES        | TRUE  | 218678 at   | -0.3372 | 0.0290  |
| cg22130834 | 55001  | TTC22      | TRUE  | 215106 at   | -0.4373 | 0.0038  |
| cg22130834 | 55001  | TTC22      | TRUE  | 215107 s at | -0.4319 | 0.0043  |
| cg22130834 | 55001  | TTC22      | TRUE  | 220309 at   | -0.3256 | 0.0354  |
| cg22238923 | 1796   | DOK1       | TRUE  | 211121 s at | -0.4750 | 0.0015  |
| cg22238923 | 1796   | DOK1       | TRUE  | 216835 s at | -0.4394 | 0.0036  |
| cg22319147 | 1003   | CDH5       | FALSE | 204677 at   | -0.6389 | <0.0001 |
| cg22343001 | 9823   | ARMCX2     | TRUE  | 203404 at   | -0.8057 | <0.0001 |
| cg22392276 | 1152   | CKB        | TRUE  | 200884 at   | -0.3230 | 0.0370  |
| cg22392708 | 25984  | KRT23      | FALSE | 218963 s at | -0.4507 | 0.0027  |
| cg22467567 | 3488   | IGFBP5     | TRUE  | 211959 at   | -0.4891 | 0.0010  |
| cg22467567 | 3488   | IGFBP5     | TRUE  | 211958 at   | -0.4200 | 0.0056  |
| cg22467567 | 3488   | IGFBP5     | TRUE  | 203425 s at | -0.3798 | 0.0131  |
| cg22467567 | 3488   | IGFBP5     | TRUE  | 203424 s at | -0.3691 | 0.0162  |
| cg22633722 | 875    | CBS        | TRUE  | 212816 s at | -0.4280 | 0.0047  |
| cg22731373 | 9468   | PCYT1B     | FALSE | 206751 s at | -0.3259 | 0.0352  |
| cg22780475 | 23624  | CBLC       | TRUE  | 220638 s at | -0.8473 | <0.0001 |
| cg22874046 | 3383   | ICAM1      | TRUE  | 202638 s at | -0.4388 | 0.0037  |
| cg22874046 | 3383   | ICAM1      | TRUE  | 202637 s at | -0.3828 | 0.0123  |
| cg22930187 | 9048   | ARTN       | TRUE  | 207675 x at | -0.3837 | 0.0121  |
| cg22930187 | 9048   | ARTN       | TRUE  | 216052 x at | -0.3551 | 0.0210  |
| cg22930187 | 9048   | ARTN       | TRUE  | 210237 at   | -0.3211 | 0.0382  |
| cg22939715 | 10712  | C1orf2     | TRUE  | 203550 s at | -0.6279 | <0.0001 |
| cg22968401 | 51268  | PIPOX      | FALSE | 221605 s at | -0.3921 | 0.0102  |
| cg22975913 | 7490   | WT1        | TRUE  | 216953 s at | -0.3452 | 0.0252  |
| cg23165541 | 23604  | DAPK2      | TRUE  | 206324 s at | -0.4154 | 0.0062  |
| cg23263923 | 970    | TNFSF7     | TRUE  | 206508 at   | -0.4852 | 0.0011  |
| cg23337754 | 1381   | CRABP1     | TRUE  | 205350 at   | -0.3079 | 0.0473  |
| cg23412850 | 8835   | SOCS2      | TRUE  | 203372 s at | -0.3346 | 0.0303  |
| cg23412850 | 8835   | SOCS2      | TRUE  | 203373 at   | -0.3059 | 0.0488  |
| cg23452458 | 114881 | OSBPL7     | FALSE | 210344 at   | -0.3634 | 0.0180  |
| cg23452458 | 114881 | OSBPL7     | FALSE | 208163 s at | -0.3287 | 0.0336  |
| cg23710218 | 9242   | MSC        | TRUE  | 209928 s at | -0.3841 | 0.0120  |
| cg23771603 | 53904  | MYO3A      | TRUE  | 221400 at   | -0.5112 | 0.0005  |
| cg23771661 | 10331  | B3GNT3     | TRUE  | 204856 at   | -0.3138 | 0.0430  |

|            |        |          |       |             |         |         |
|------------|--------|----------|-------|-------------|---------|---------|
| cg23887396 | 23098  | SARM1    | TRUE  | 213259 s at | -0.6578 | <0.0001 |
| cg23887396 | 23098  | SARM1    | TRUE  | 213257 at   | -0.5604 | 0.0001  |
| cg24070292 | 7169   | TPM2     | TRUE  | 204083 s at | -0.8335 | <0.0001 |
| cg24070292 | 7169   | TPM2     | TRUE  | 212654 at   | -0.7090 | <0.0001 |
| cg24130010 | 140578 | CHODL    | TRUE  | 219867 at   | -0.4763 | 0.0014  |
| cg24155668 | 5603   | MAPK13   | TRUE  | 210059 s at | -0.8278 | <0.0001 |
| cg24155668 | 5603   | MAPK13   | TRUE  | 210058 at   | -0.8210 | <0.0001 |
| cg24332422 | 324    | APC      | TRUE  | 203525 s at | -0.3625 | 0.0183  |
| cg24384676 | 89874  | SLC25A21 | TRUE  | 220474 at   | -0.3545 | 0.0213  |
| cg24447042 | 6594   | SMARCA1  | TRUE  | 203875 at   | -0.3948 | 0.0097  |
| cg24447042 | 6594   | SMARCA1  | TRUE  | 215294 s at | -0.3619 | 0.0185  |
| cg24447042 | 6594   | SMARCA1  | TRUE  | 203874 s at | -0.3556 | 0.0208  |
| cg24594997 | 5947   | RBP1     | TRUE  | 203423 at   | -0.6506 | <0.0001 |
| cg24794531 | 7220   | TRPC1    | TRUE  | 205803 s at | -0.4130 | 0.0066  |
| cg24794531 | 7220   | TRPC1    | TRUE  | 205802 at   | -0.3323 | 0.0315  |
| cg24794531 | 7220   | TRPC1    | TRUE  | 211602 s at | -0.3227 | 0.0371  |
| cg24852661 | 51280  | GOLPH2   | TRUE  | 217771 at   | -0.4894 | 0.0010  |
| cg24860534 | 8476   | CDC42BPA | TRUE  | 214464 at   | -0.4000 | 0.0087  |
| cg24860534 | 8476   | CDC42BPA | TRUE  | 213595 s at | -0.3197 | 0.0390  |
| cg24930915 | 25837  | RAB26    | TRUE  | 219562 at   | -0.4267 | 0.0048  |
| cg24930915 | 25837  | RAB26    | TRUE  | 50965 at    | -0.4033 | 0.0081  |
| cg25228126 | 2535   | FZD2     | TRUE  | 210220 at   | -0.3563 | 0.0206  |
| cg25300386 | 1278   | COL1A2   | TRUE  | 202403 s at | -0.4685 | 0.0018  |
| cg25300386 | 1278   | COL1A2   | TRUE  | 202404 s at | -0.4097 | 0.0071  |
| cg25341653 | 79767  | ELMO3    | TRUE  | 219411 at   | -0.8910 | <0.0001 |
| cg25361106 | 3196   | TLX2     | TRUE  | 211049 at   | -0.3396 | 0.0278  |
| cg25416372 | 53637  | EDG8     | TRUE  | 221417 x at | -0.3412 | 0.0270  |
| cg25589890 | 80329  | ULBP1    | TRUE  | 221323 at   | -0.3051 | 0.0494  |
| cg25799986 | 10406  | WFDC2    | TRUE  | 203892 at   | -0.6934 | <0.0001 |
| cg25821963 | 22885  | ABLIM3   | TRUE  | 205730 s at | -0.3307 | 0.0324  |
| cg25836271 | 10235  | RASGRP2  | TRUE  | 208206 s at | -0.3446 | 0.0254  |
| cg25946374 | 58985  | IL22RA1  | FALSE | 220056 at   | -0.4593 | 0.0022  |
| cg26014796 | 80352  | RNF39    | TRUE  | 219916 s at | -0.3787 | 0.0134  |
| cg26036443 | 30846  | EHD2     | TRUE  | 45297 at    | -0.7666 | <0.0001 |
| cg26036443 | 30846  | EHD2     | TRUE  | 221870 at   | -0.7187 | <0.0001 |
| cg26036443 | 30846  | EHD2     | TRUE  | 205341 at   | -0.5997 | <0.0001 |
| cg26117023 | 1796   | DOK1     | TRUE  | 211121 s at | -0.6908 | <0.0001 |
| cg26117023 | 1796   | DOK1     | TRUE  | 216835 s at | -0.6623 | <0.0001 |
| cg26220350 | 5360   | PLTP     | TRUE  | 202075 s at | -0.6995 | <0.0001 |
| cg26279025 | 3589   | IL11     | TRUE  | 206924 at   | -0.3899 | 0.0107  |
| cg26317056 | 23530  | NNT      | TRUE  | 202783 at   | -0.6896 | <0.0001 |
| cg26317056 | 23530  | NNT      | TRUE  | 202784 s at | -0.6736 | <0.0001 |
| cg26333317 | 25840  | METTL7A  | FALSE | 207761 s at | -0.4685 | 0.0018  |
| cg26333317 | 25840  | METTL7A  | FALSE | 209703 x at | -0.3325 | 0.0314  |
| cg26968812 | 7171   | TPM4     | TRUE  | 212481 s at | -0.6165 | <0.0001 |
| cg26968812 | 7171   | TPM4     | TRUE  | 209344 at   | -0.6092 | <0.0001 |
| cg26987645 | 2331   | FMOD     | TRUE  | 202709 at   | -0.4221 | 0.0054  |
| cg27176536 | 25837  | RAB26    | TRUE  | 219562 at   | -0.4269 | 0.0048  |
| cg27176536 | 25837  | RAB26    | TRUE  | 50965 at    | -0.3894 | 0.0108  |
| cg27234090 | 9099   | USP2     | TRUE  | 207213 s at | -0.3284 | 0.0337  |
| cg27264345 | 51308  | REEP2    | TRUE  | 205331 s at | -0.4892 | 0.0010  |
| cg27329371 | 218    | ALDH3A1  | FALSE | 205623 at   | -0.3191 | 0.0394  |
| cg27379587 | 4828   | NMB      | TRUE  | 205204 at   | -0.6882 | <0.0001 |
| cg27397287 | 976    | CD97     | TRUE  | 202910 s at | -0.6930 | <0.0001 |
| cg27420236 | 56475  | RPRM     | TRUE  | 219370 at   | -0.4385 | 0.0037  |

**Supplementary Table 5b** 22 genes (30 probes) identified as hypomethylated in CCC

| Probe ID   | Gene ID | Symbol    | CPG ISLAND | U133A2      | R value | P value |
|------------|---------|-----------|------------|-------------|---------|---------|
| cg02286642 | 9534    | ZNF254    | FALSE      | 206862 at   | -0.3218 | 0.0377  |
| cg02335804 | 6928    | TCF2      | FALSE      | 205313 at   | -0.7712 | <0.0001 |
| cg02335804 | 6928    | TCF2      | FALSE      | 208135 at   | -0.5324 | 0.0003  |
| cg06444781 | 6927    | TCF1      | TRUE       | 210515 at   | -0.4036 | 0.0080  |
| cg07403255 | 7849    | PAX8      | TRUE       | 214528 s at | -0.8830 | <0.0001 |
| cg07403255 | 7849    | PAX8      | TRUE       | 209552 at   | -0.8549 | <0.0001 |
| cg07403255 | 7849    | PAX8      | TRUE       | 121 at      | -0.8494 | <0.0001 |
| cg07403255 | 7849    | PAX8      | TRUE       | 207924 x at | -0.8485 | <0.0001 |
| cg07403255 | 7849    | PAX8      | TRUE       | 207923 x at | -0.8207 | <0.0001 |
| cg07403255 | 7849    | PAX8      | TRUE       | 213917 at   | -0.7862 | <0.0001 |
| cg07403255 | 7849    | PAX8      | TRUE       | 207921 x at | -0.7845 | <0.0001 |
| cg07403255 | 7849    | PAX8      | TRUE       | 221990 at   | -0.6610 | <0.0001 |
| cg07810156 | 10158   | PDZK1IP1  | FALSE      | 219630 at   | -0.8312 | <0.0001 |
| cg10025865 | 866     | SERPINA6  | FALSE      | 206325 at   | -0.4837 | 0.0012  |
| cg10321723 | 5174    | PDZK1     | FALSE      | 205380 at   | -0.5911 | <0.0001 |
| cg10734665 | 57194   | ATP10A    | TRUE       | 214255 at   | -0.7310 | <0.0001 |
| cg11286122 | 23187   | PHLDB1    | FALSE      | 212134 at   | -0.3343 | 0.0305  |
| cg11639651 | 80201   | HKDC1     | FALSE      | 220585 at   | -0.5194 | 0.0004  |
| cg11762346 | 80201   | HKDC1     | FALSE      | 220585 at   | -0.6174 | <0.0001 |
| cg11964613 | 415     | ARSE      | FALSE      | 205894 at   | -0.6941 | <0.0001 |
| cg12640109 | 80150   | ASRGL1    | TRUE       | 218857 s at | -0.4588 | 0.0022  |
| cg12762799 | 26253   | CLEC4E    | FALSE      | 219859 at   | -0.4962 | 0.0008  |
| cg12788467 | 6928    | TCF2      | TRUE       | 205313 at   | -0.8305 | <0.0001 |
| cg12788467 | 6928    | TCF2      | TRUE       | 208135 at   | -0.5391 | 0.0002  |
| cg13019092 | 5174    | PDZK1     | FALSE      | 205380 at   | -0.5092 | 0.0006  |
| cg13652336 | 80243   | DEPDC2    | TRUE       | 220732 at   | -0.4743 | 0.0015  |
| cg13688966 | 7104    | TM4SF4    | FALSE      | 209937 at   | -0.4877 | 0.0011  |
| cg15187606 | 10158   | PDZK1IP1  | FALSE      | 219630 at   | -0.4569 | 0.0024  |
| cg15661409 | 55195   | C14orf105 | FALSE      | 220084 at   | -0.6212 | <0.0001 |
| cg15967525 | 54502   | FLJ20273  | FALSE      | 218035 s at | -0.4271 | 0.0048  |
| cg16175725 | 6927    | TCF1      | TRUE       | 210515 at   | -0.4792 | 0.0013  |
| cg17463527 | 10110   | SGK2      | FALSE      | 220357 s at | -0.6872 | <0.0001 |
| cg20199333 | 2147    | F2        | FALSE      | 205754 at   | -0.7240 | <0.0001 |
| cg21516287 | 65999   | LRRC61    | TRUE       | 218907 s at | -0.6681 | <0.0001 |
| cg21685427 | 10110   | SGK2      | FALSE      | 220357 s at | -0.6172 | <0.0001 |
| cg22376897 | 415     | ARSE      | FALSE      | 205894 at   | -0.5956 | <0.0001 |
| cg24248317 | 54978   | C2orf18   | TRUE       | 219783 at   | -0.6582 | <0.0001 |
| cg24603941 | 117153  | MIA2      | FALSE      | 221177 at   | -0.6689 | <0.0001 |
| cg25042226 | 7849    | PAX8      | TRUE       | 214528 s at | -0.8888 | <0.0001 |
| cg25042226 | 7849    | PAX8      | TRUE       | 209552 at   | -0.8627 | <0.0001 |
| cg25042226 | 7849    | PAX8      | TRUE       | 207924 x at | -0.8585 | <0.0001 |
| cg25042226 | 7849    | PAX8      | TRUE       | 121 at      | -0.8569 | <0.0001 |
| cg25042226 | 7849    | PAX8      | TRUE       | 207923 x at | -0.8282 | <0.0001 |
| cg25042226 | 7849    | PAX8      | TRUE       | 207921 x at | -0.7884 | <0.0001 |
| cg25042226 | 7849    | PAX8      | TRUE       | 213917 at   | -0.7836 | <0.0001 |
| cg25042226 | 7849    | PAX8      | TRUE       | 221990 at   | -0.6686 | <0.0001 |



| <b>Supplementary Table 6</b> Categorical analysis of ‘transcription factor targets’ of 22 UM genes in CCC <sup>a</sup> |               |                |                |
|------------------------------------------------------------------------------------------------------------------------|---------------|----------------|----------------|
| <b>MSigID.c3.tft</b>                                                                                                   | <b>probes</b> | <b>z score</b> | <b>p value</b> |
| <b>V\$HNF1_Q6*</b>                                                                                                     | 340           | 13.91          | <0.000001      |
| V\$PPARA_01                                                                                                            | 47            | 10.88          | <0.000001      |
| V\$HNF6_Q6                                                                                                             | 301           | 8.29           | <0.000001      |
| <b>V\$HNF1_C*</b>                                                                                                      | 304           | 8.24           | <0.000001      |
| <b>V\$HNF1_01*</b>                                                                                                     | 305           | 8.23           | <0.000001      |
| <b>RGTTAMWNATT_V\$HNF1_01*</b>                                                                                         | 99            | 7.36           | <0.000001      |
| V\$SER_Q6_01                                                                                                           | 317           | 5.92           | <0.000001      |
| V\$TEF_Q6                                                                                                              | 326           | 5.83           | <0.000001      |
| V\$HNF4_01                                                                                                             | 347           | 5.62           | <0.000001      |
| V\$NKX25_01                                                                                                            | 169           | 5.49           | <0.000001      |
| V\$CDPCR1_01                                                                                                           | 180           | 5.30           | <0.000001      |
| RAAGNYNNCTTY_UNKNOWN                                                                                                   | 181           | 5.28           | <0.000001      |
| V\$FOXD3_01                                                                                                            | 278           | 4.11           | 1.99E-05       |
| V\$AR_Q6                                                                                                               | 279           | 4.10           | 2.07E-05       |

a All four terms representing HNF1 transcription factor binding activity (\*) were enriched among the 22 CCC-specific UM genes.

## **Supplementary Figure Legends**

**Supplementary Figure 1** Scheme of methodologies used for (A) the identification of genes exhibiting differential methylation between CCC and non-CCC cells and (B) the identification of candidate genes functionally regulated by DNA methylation in CCC.

**Supplementary Figure 2** Validation of Infinium beta-values by quantitative bisulfite pyrosequencing of the same CpG site represented on the Infinium platform.

**Supplementary Figure 3** Correlation between the Infinium assay beta-values and methylation values as measured by quantitative bisulfite pyrosequencing for CpG sites adjacent to those represented on the Infinium platform.

**Supplementary Figure 4** Supervised hierarchical clustering of two independent expression microarray datasets using clinical samples, GSE6008 (A) and GSE2109 (B), was performed using only the genes regulated by DNA methylation listed in Supplementary Table 5. CCC was clearly divided from non-CCC samples by these genes. The CCC-specific UM genes generated a distinct cluster of genes highly expressed in CCC (yellow squares). The color bar on the right represents methylation status; red indicates CCC-specific UM genes and green indicates CCC-specific HM genes.

**Supplementary Figure 5** Amplicons produced from cell lines by methylation-specific PCR for six ERalpha network genes: *ESR1* (A), *BMP4* (B), *DKK1* (C), *SOX11* (D), *SNCG* (E) and *MOSCI* (F). Some samples were analyzed in duplicate. Abbreviations; M: amplicons produced from the primer set complementary to the methylated bisulfite modified sequence, U: amplicons produced from the primer set complementary to the unmethylated bisulfite modified sequence, (+): bisulfite modified CpGenome Universal Methylated DNA (Millipore Co.) as positive control, g: genomic DNA, 0%: human normal lymphocytes, 50%: a 50:50 mixture of positive control and normal lymphocytes, 100%: positive methylated control, NTC: no template control.

**Supplementary Figure 6** Amplicons produced from clinical ovarian cancer specimens by methylation-specific PCR for six ERalpha network genes: *ESR1* (A), *BMP4* (B), *DKK1* (C), *SOX11* (D), *SNCG* (E) and *MOSCI* (F). Some samples were analyzed in duplicate. Abbreviations; M: amplicons produced from the primer set complementary to the methylated bisulfite modified sequence, U: amplicons produced from the primer set complementary to the unmethylated bisulfite modified sequence, (+): bisulfite modified CpGenome Universal Methylated DNA (Millipore Co.) as positive control, g: genomic DNA, 0%: human normal lymphocytes, 50%: a 50:50 mixture of positive control and normal lymphocytes, 100%: positive methylated control, NTC: no template control.

# Supplementary Figure 1

a)

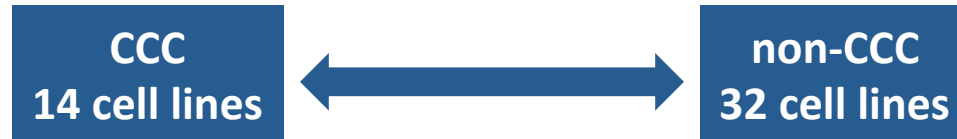

1. Student t-tests  $p < 0.01$
2. Average beta value difference  $> 0.2$

Hypomethylation in CCC  
44 genes (54 CpG sites)

Hypermethylation in CCC  
856 genes (1042 CpG sites)

b)

3. Inverse correlation between beta-value and mRNA expression in 42 ovarian cancer parental cell lines ( $p < 0.05$ )

Activated via hypomethylation in CCC  
22 genes / total 33 genes (66.7%)

Suppressed via hypermethylation in CCC  
276 genes / total 625 genes (44.2%)

## Supplementary Figure 2

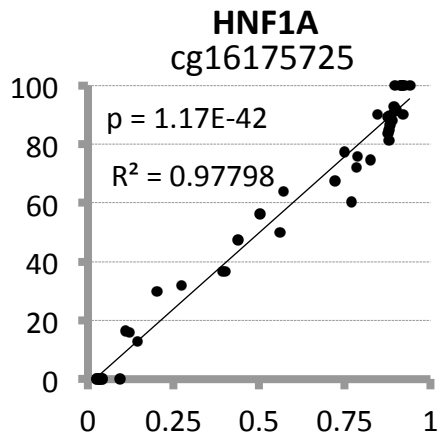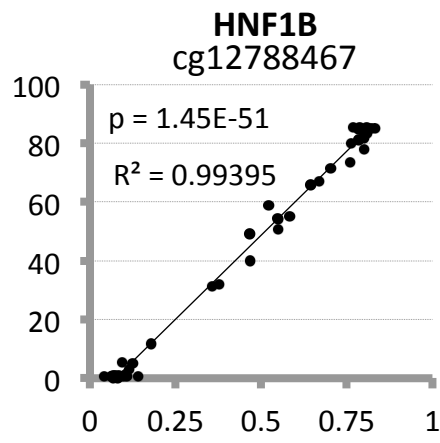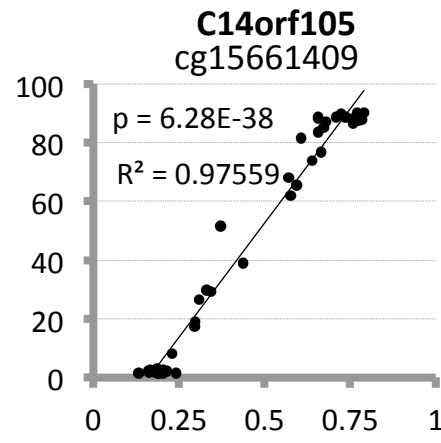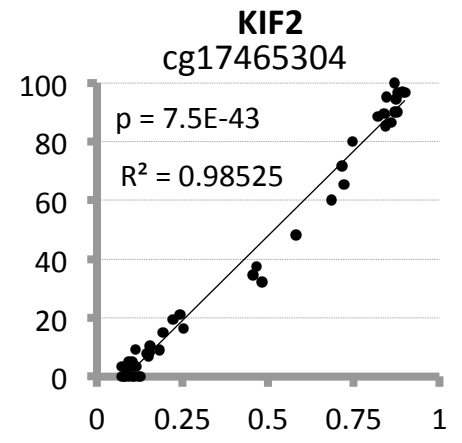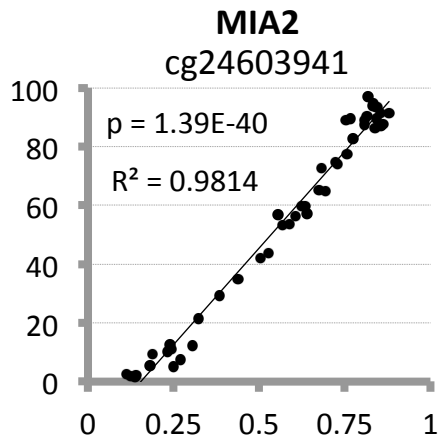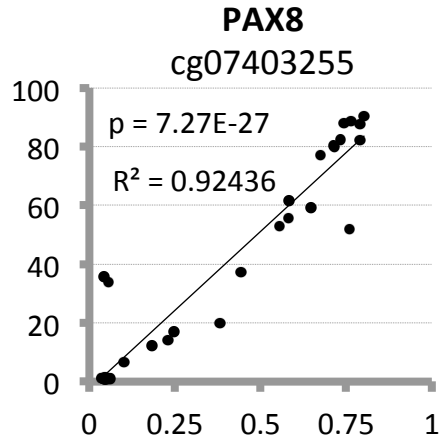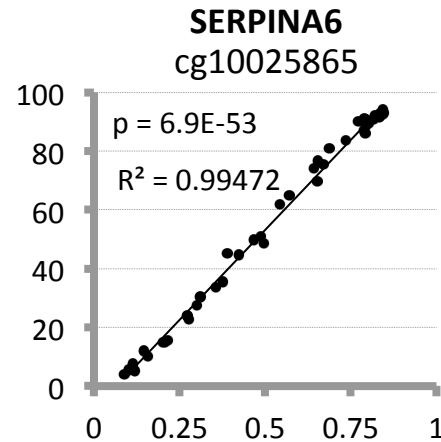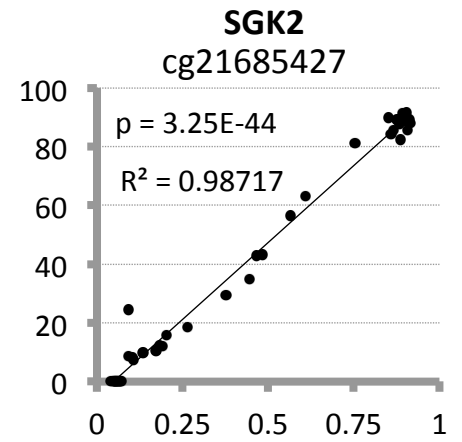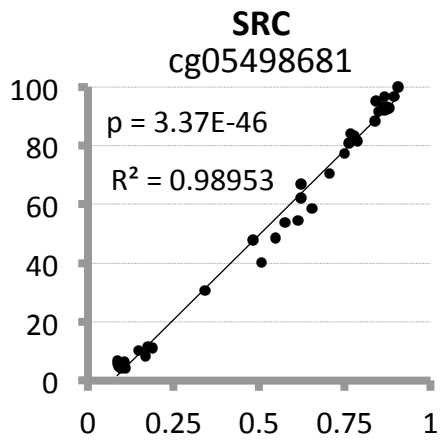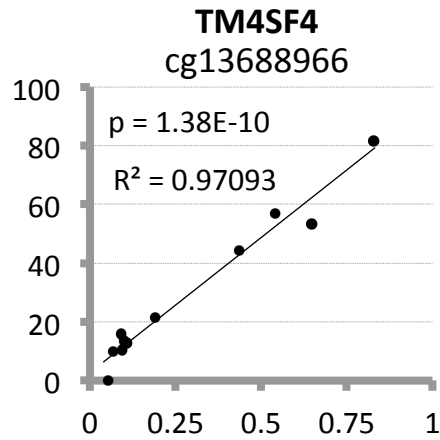

### Supplementary Figure 3

**HNF1A\_Pos.1**

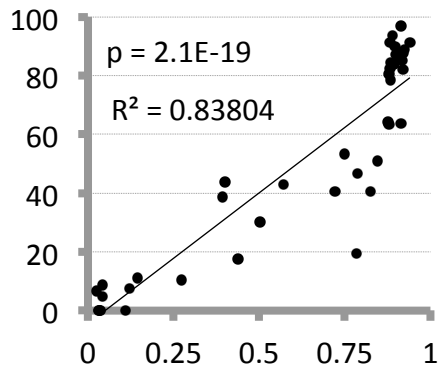

**HNF1A\_Pos.2**

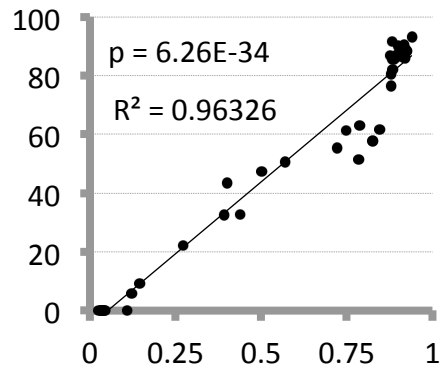

**HNF1A\_Pos.3**

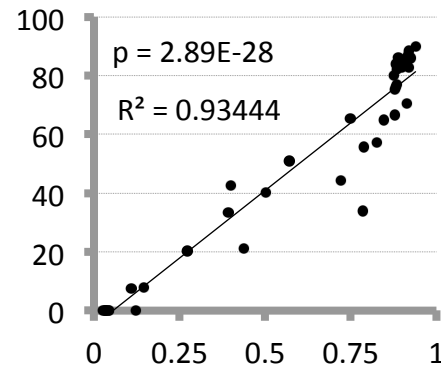

**HNF1A\_Pos.4**

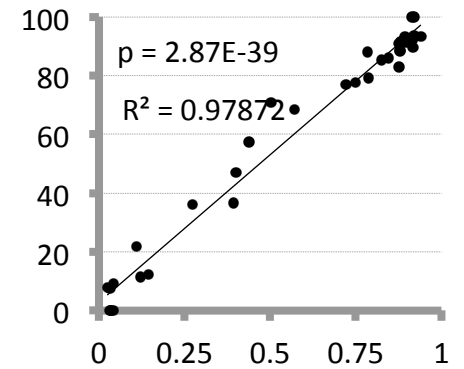

**HNF1B\_Pos.1**

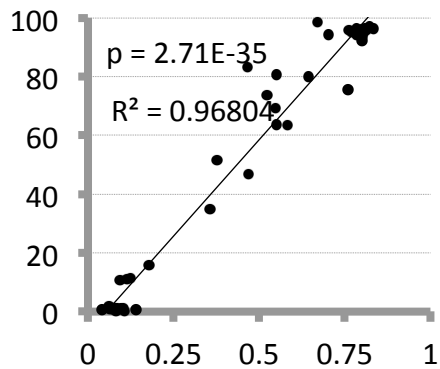

**HNF1B\_Pos.2**

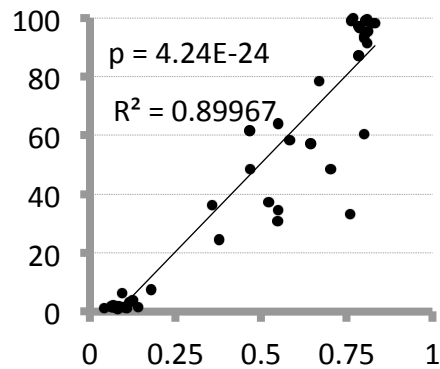

**HNF1B\_Pos.3**

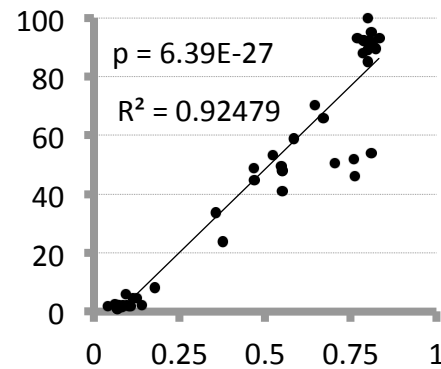

**C14orf105\_Pos.1**

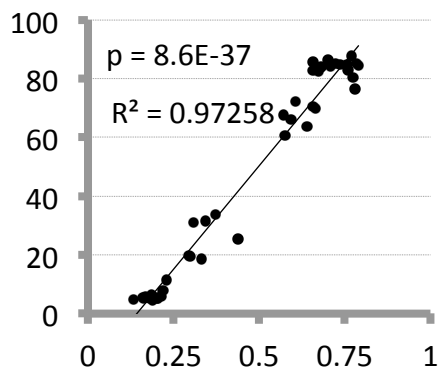

**C14orf105\_Pos.3**

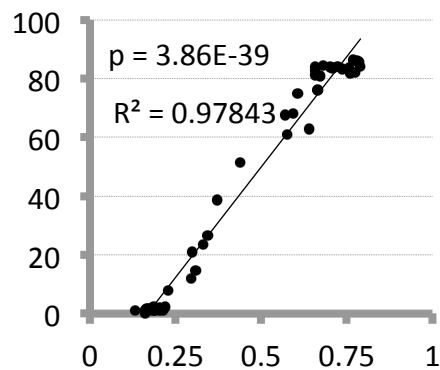

**C14orf105\_Pos.4**

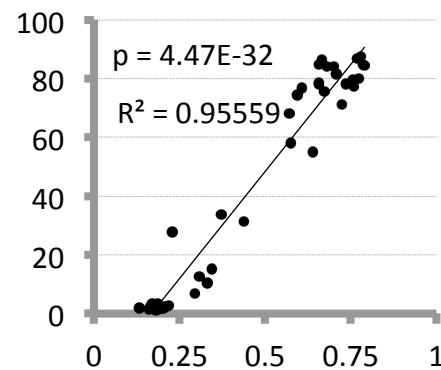

# Supplementary Figure 3 (cont.)

## KIF12\_Pos.2

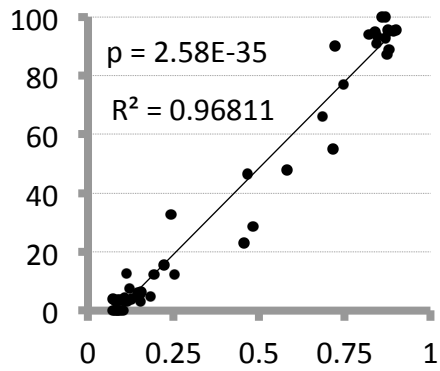

## KIF12\_Pos.3

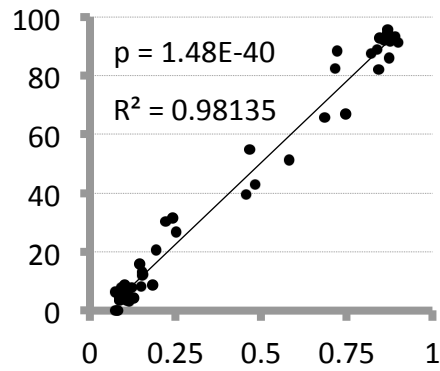

## KIF12\_Pos.4

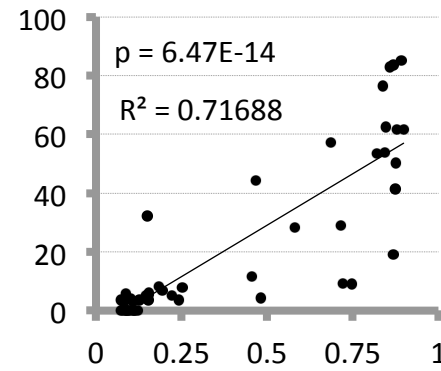

## PAX8\_Pos.1

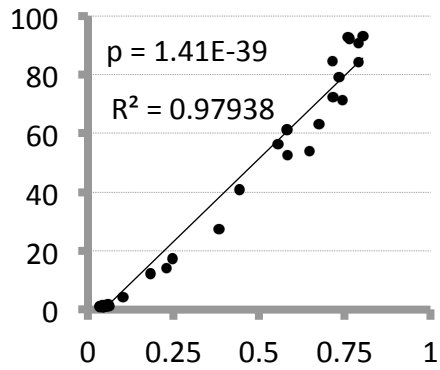

## SGK2\_Pos.2

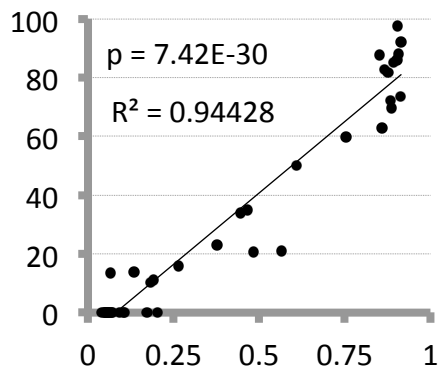

## SGK2\_Pos.3

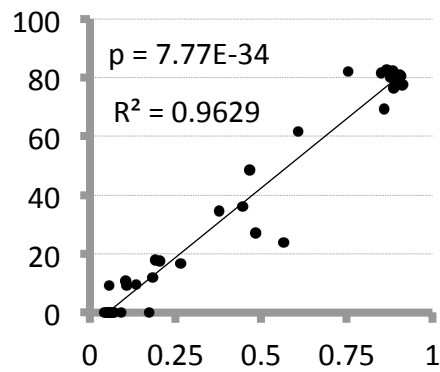

# Supplementary Figure 3 (cont.)

## SRC\_Pos.1

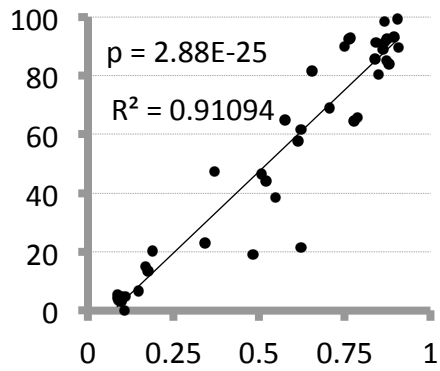

## SRC\_Pos.3

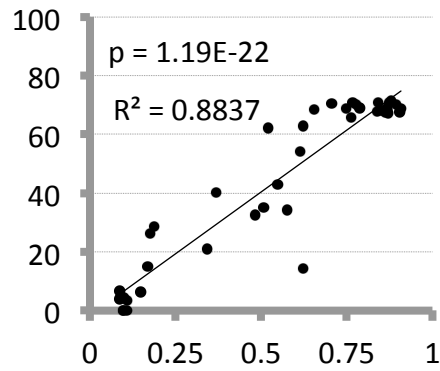

## TM4SF4\_Pos.2

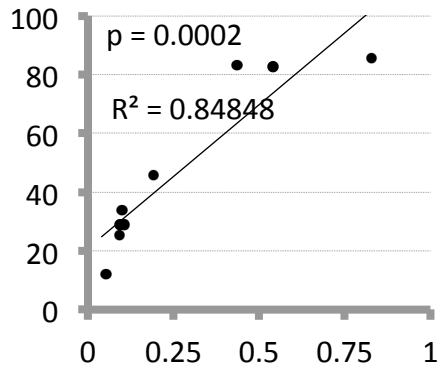

## F2\_Pos.1

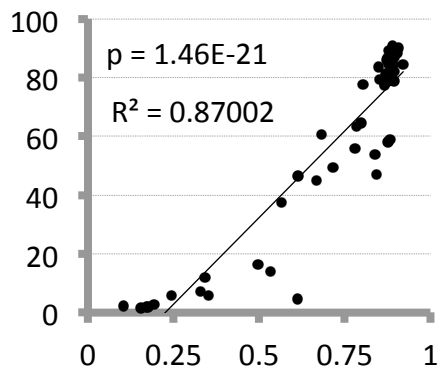

## F2\_Pos.2

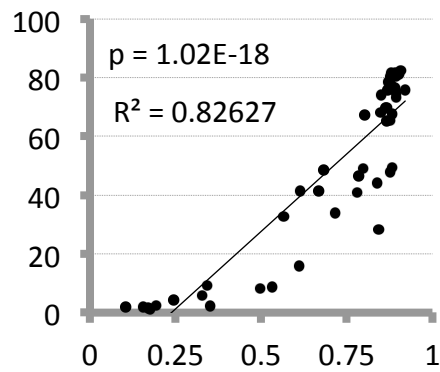

## F2\_Pos.3

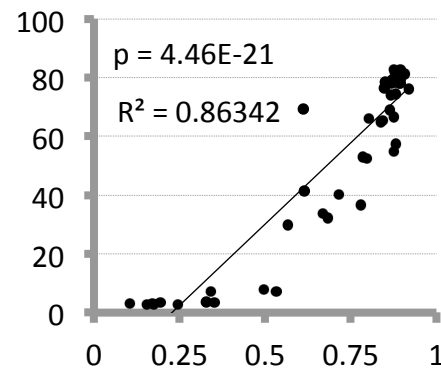



Supplementary Figure 4

a)

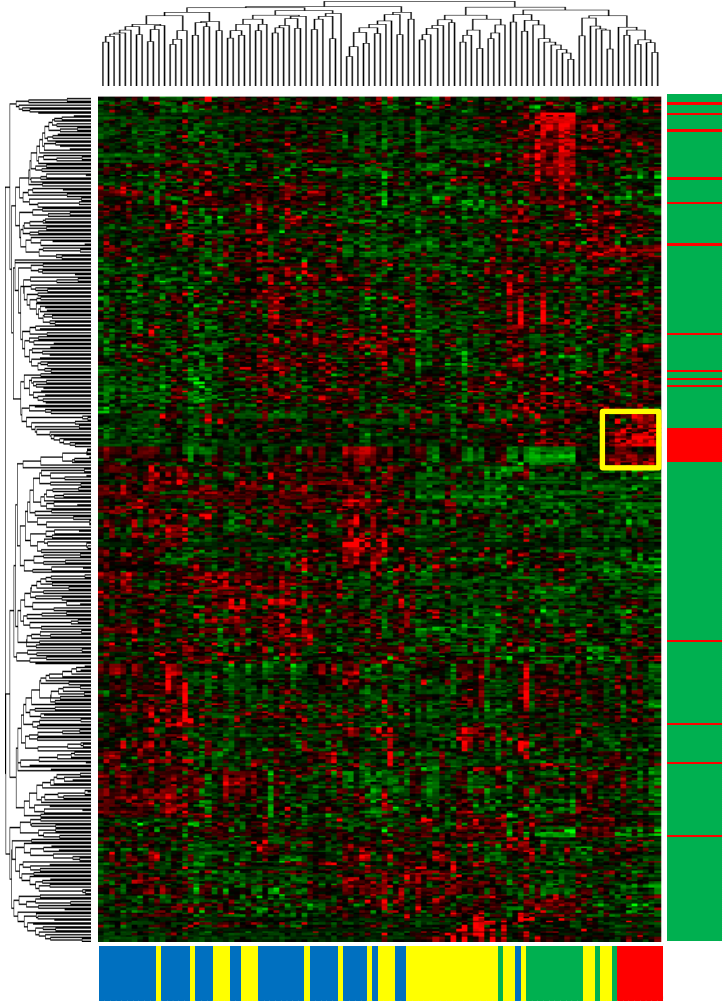

b)

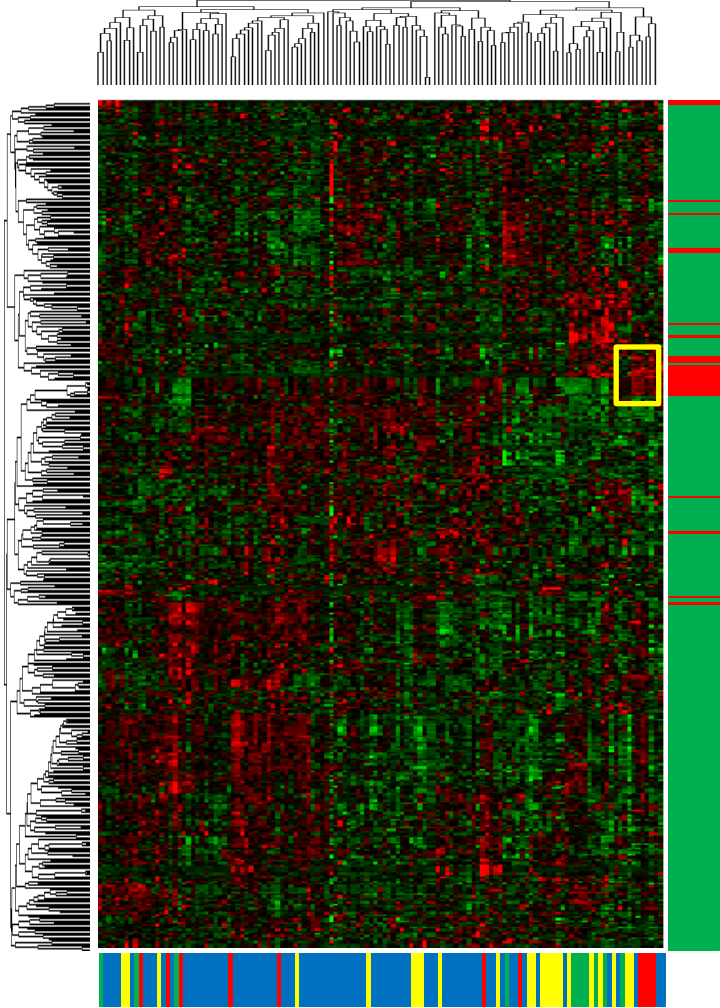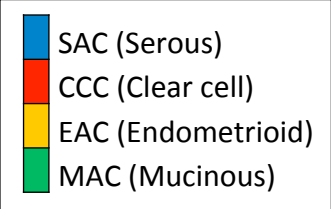

# Supplementary Figure 5

a)

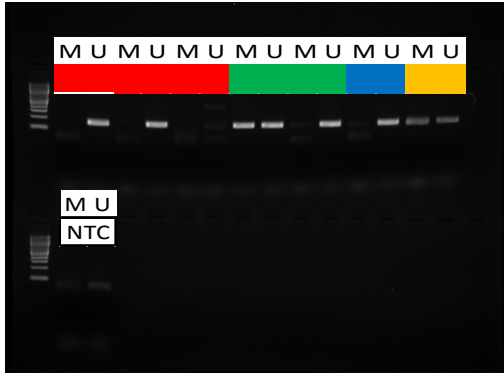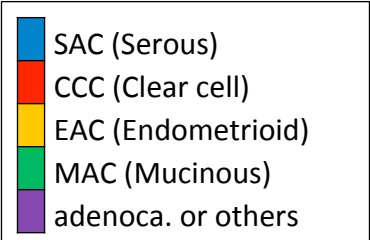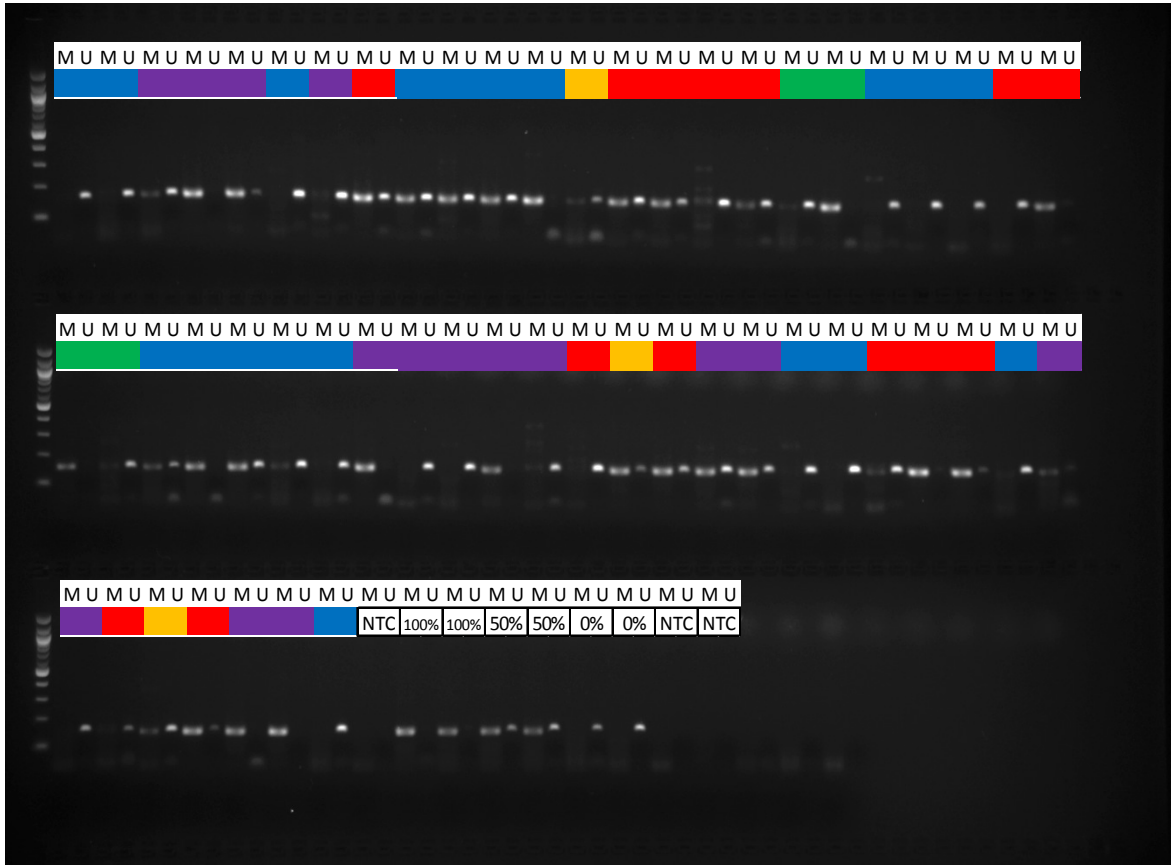

# Supplementary Figure 5 (cont.)

c)

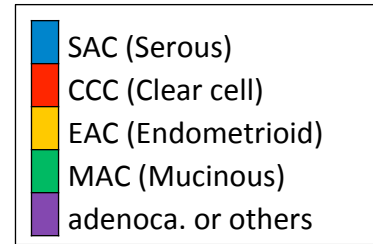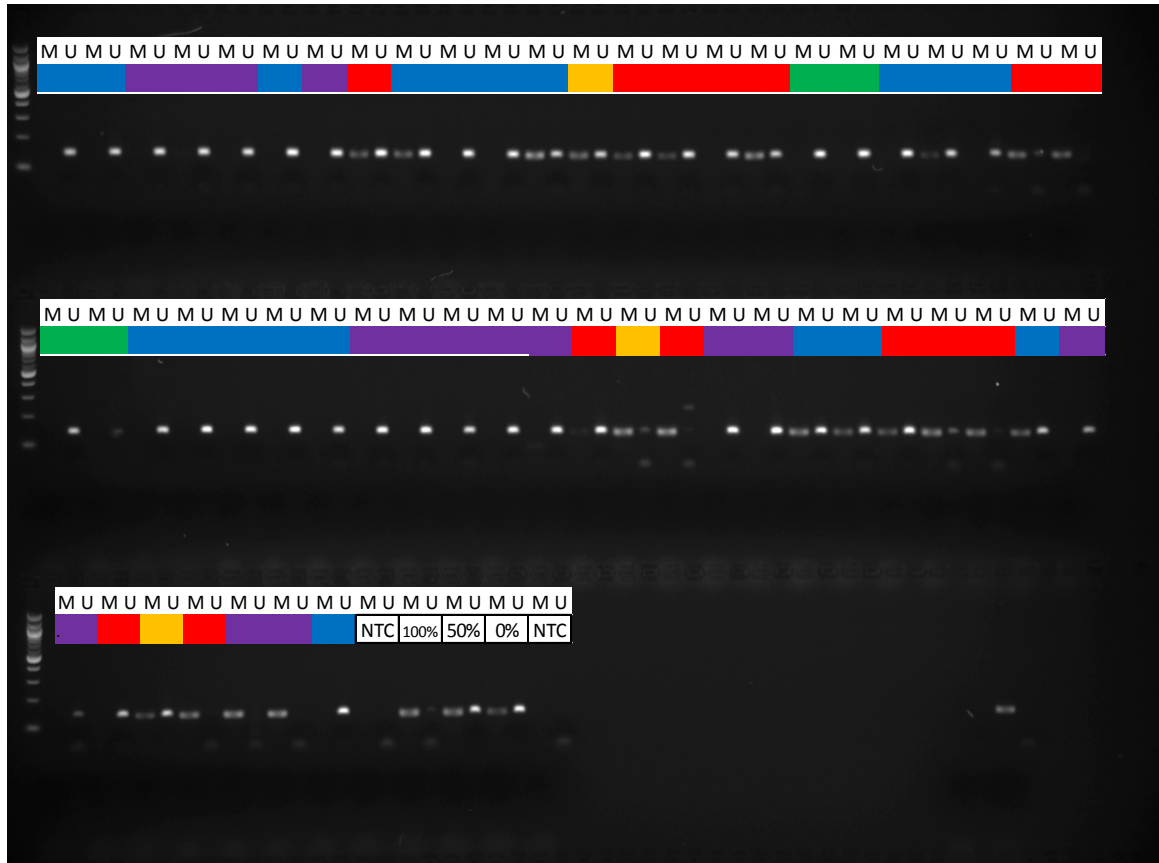



Supplementary Figure 5 (cont.)

d)

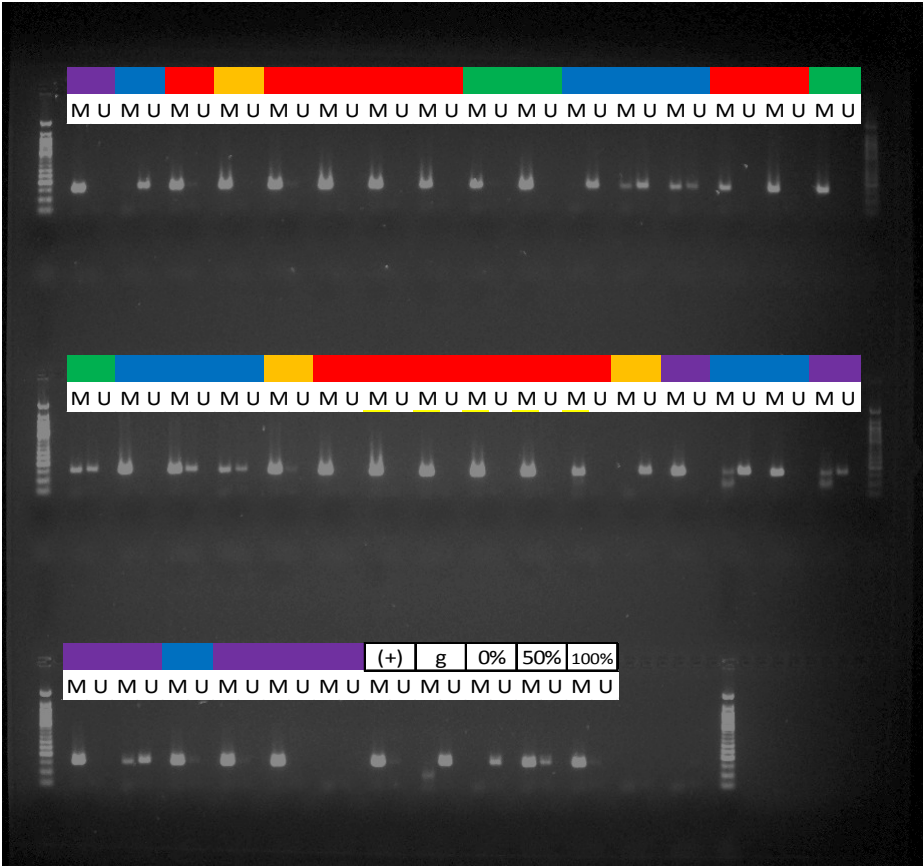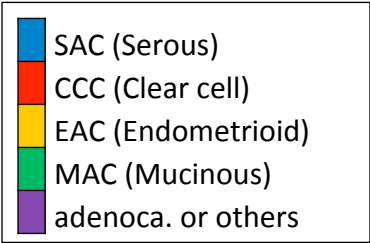

Supplementary Figure 5 (cont.)

e)

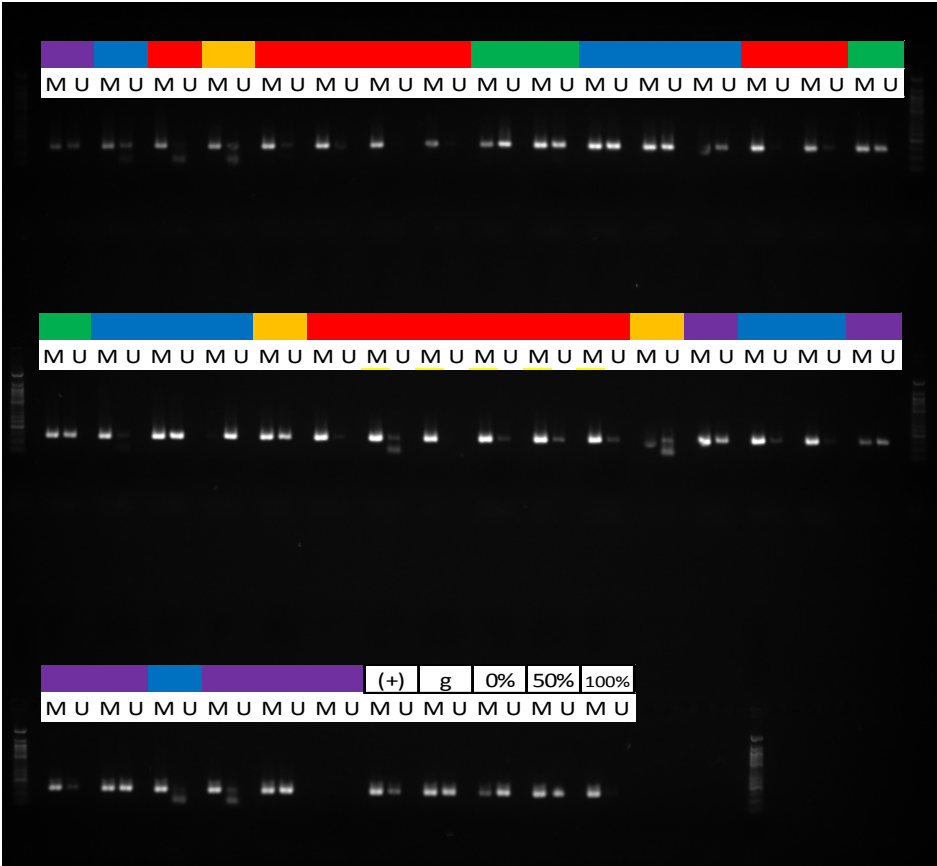

- SAC (Serous)
- CCC (Clear cell)
- EAC (Endometrioid)
- MAC (Mucinous)
- adenoca. or others

Supplementary Figure 5 (cont.)

f)

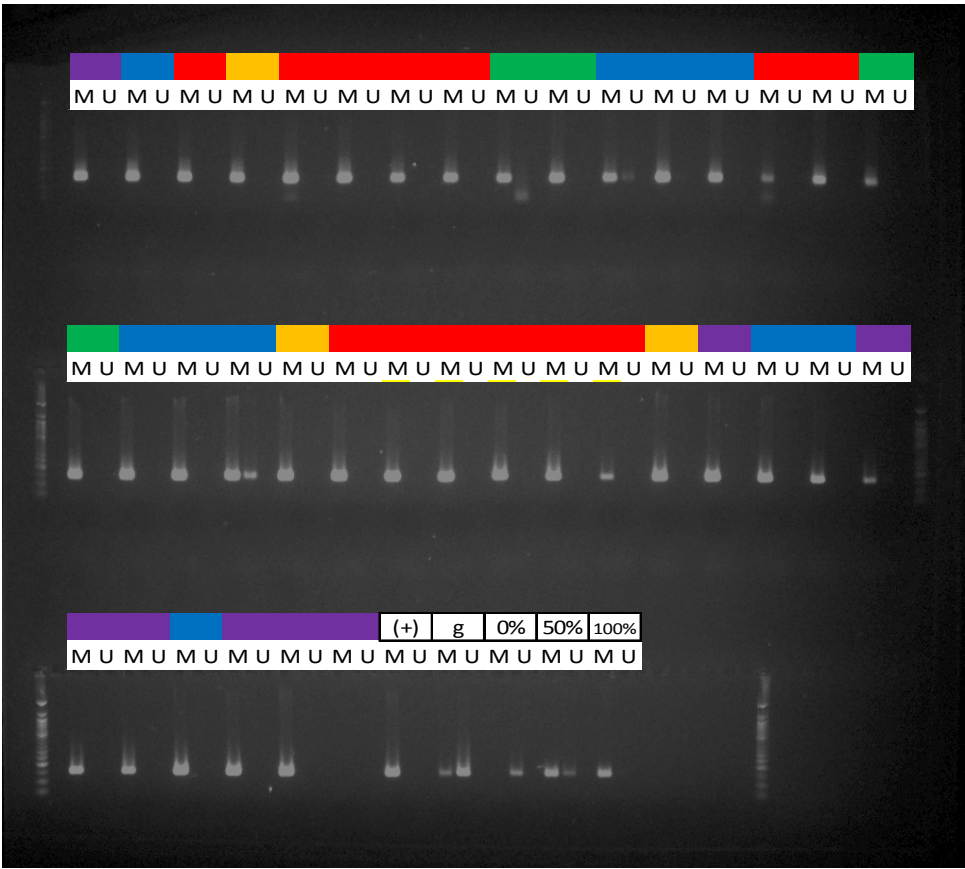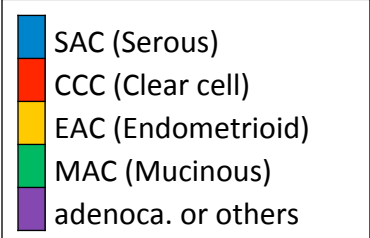

# Supplementary Figure 6

a)

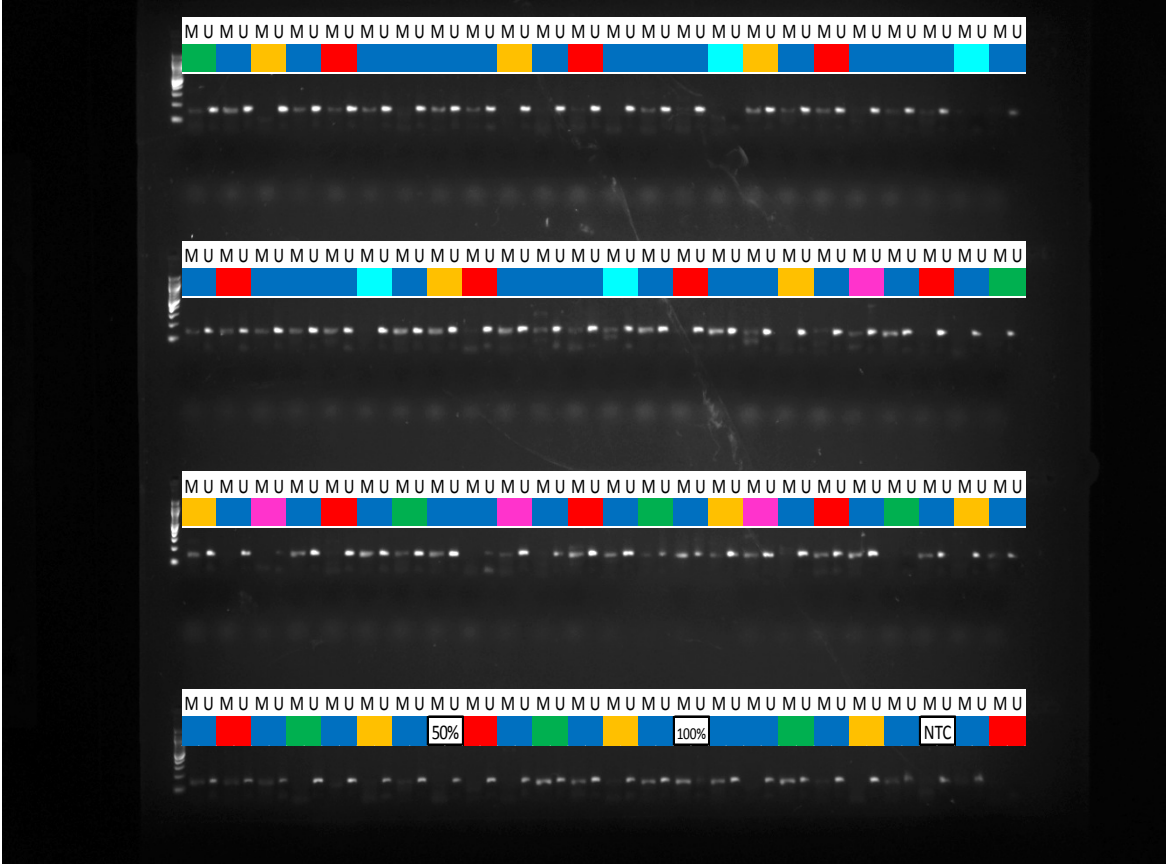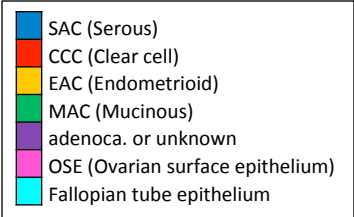



Supplementary Figure 6 (cont.)

c)

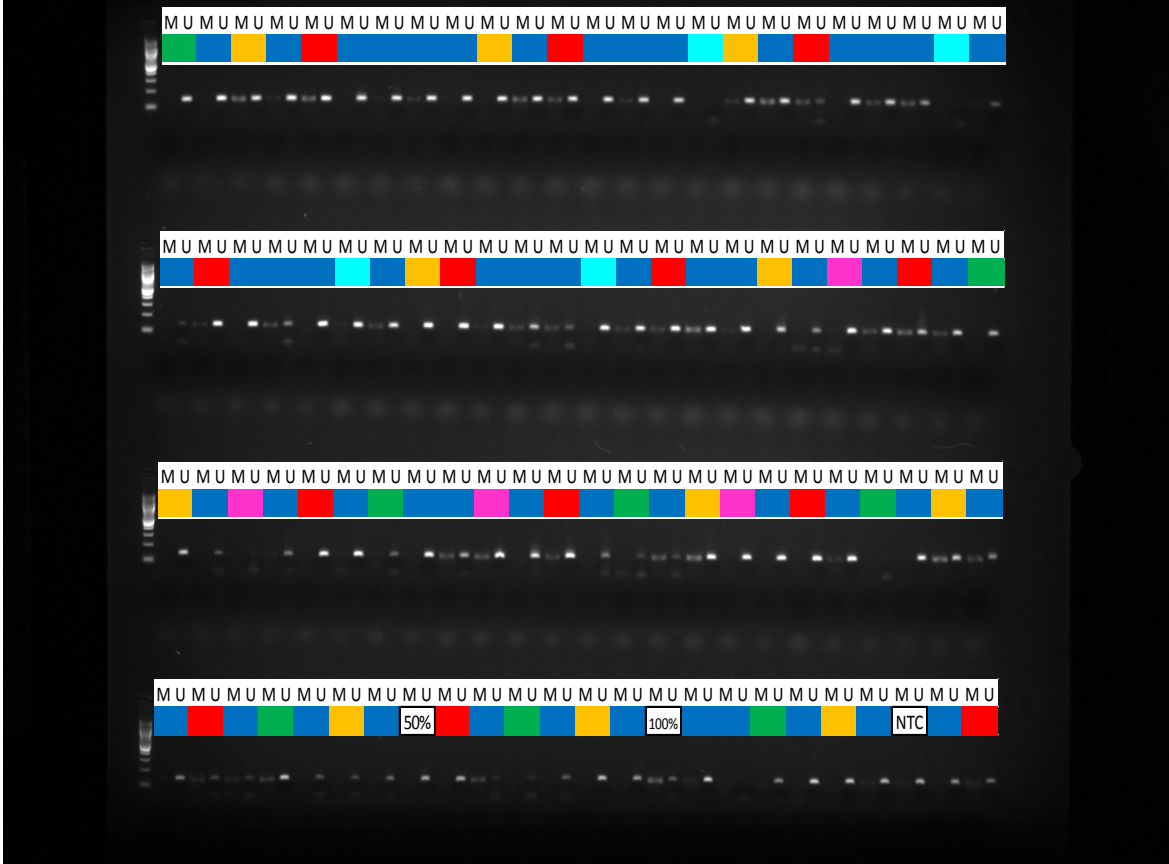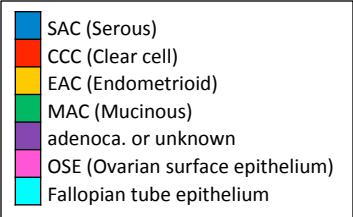

Supplementary Figure 6 (cont.)

b)

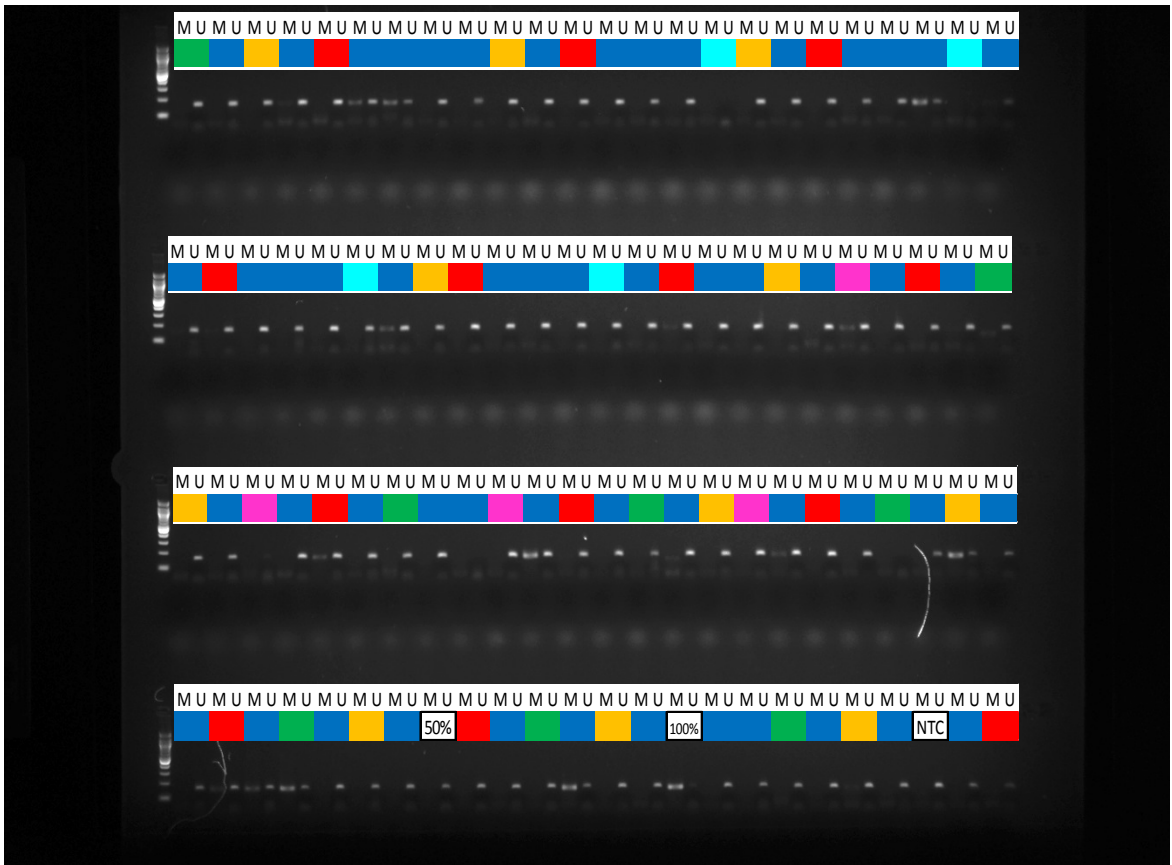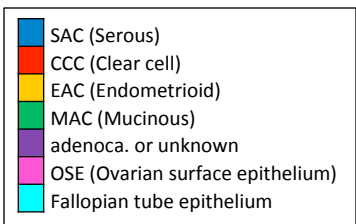

Supplementary Figure 6 (cont.)

d)

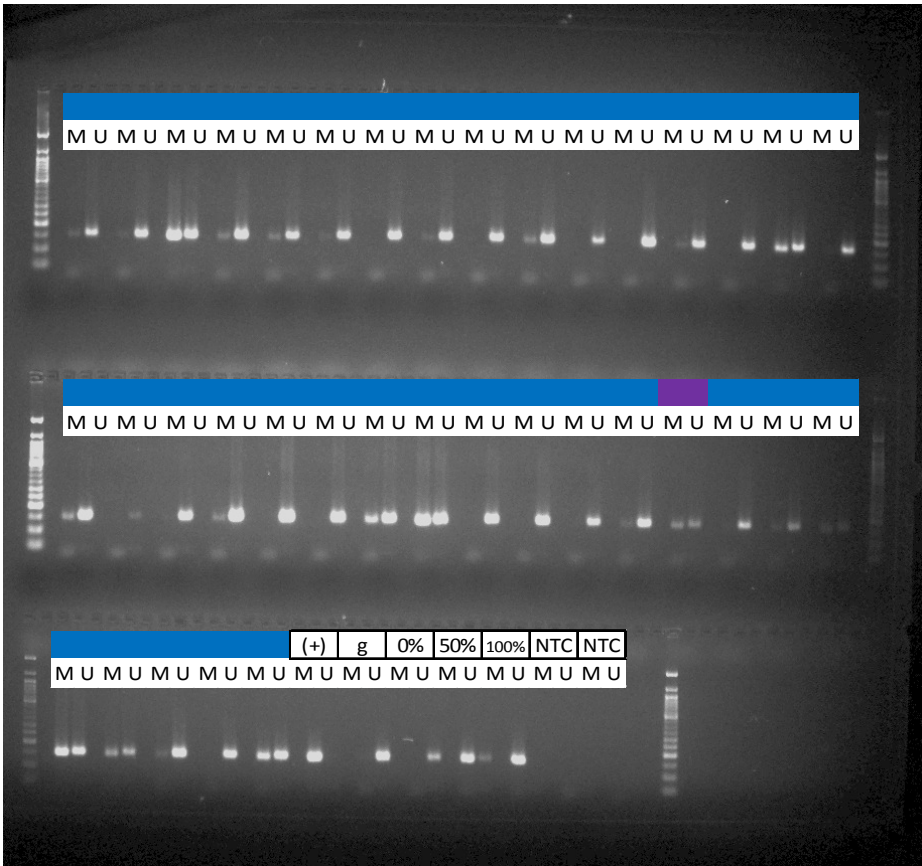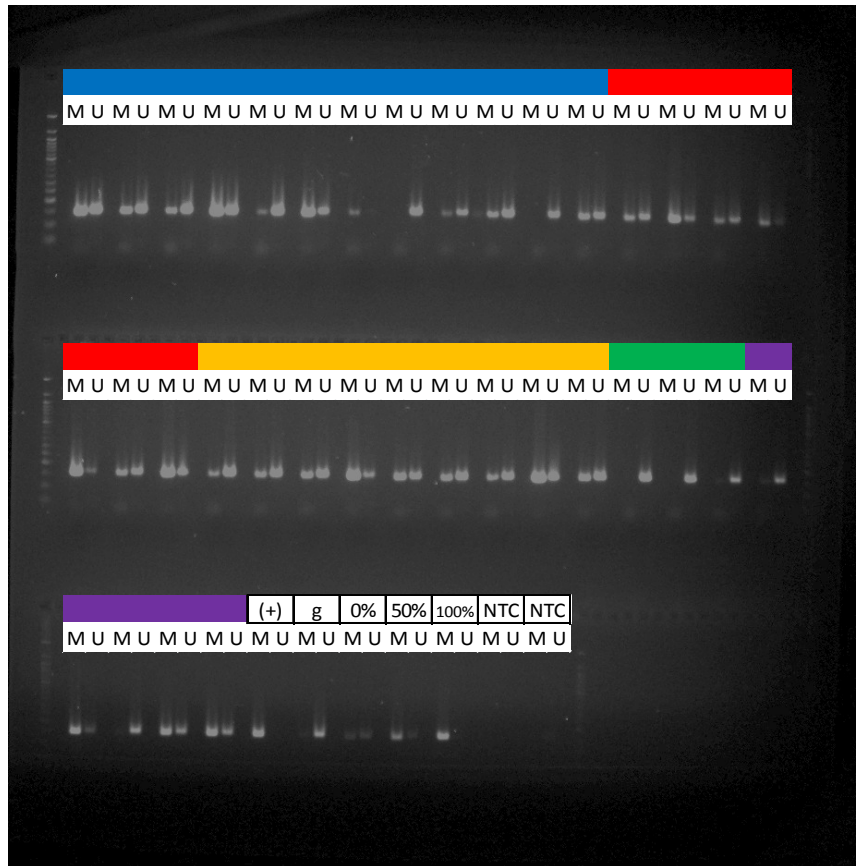

- SAC (Serous)
- CCC (Clear cell)
- EAC (Endometrioid)
- MAC (Mucinous)
- adenoca. or unknown
- OSE (Ovarian surface epithelium)
- Fallopian tube epithelium

Supplementary Figure 6 (cont.)

e)

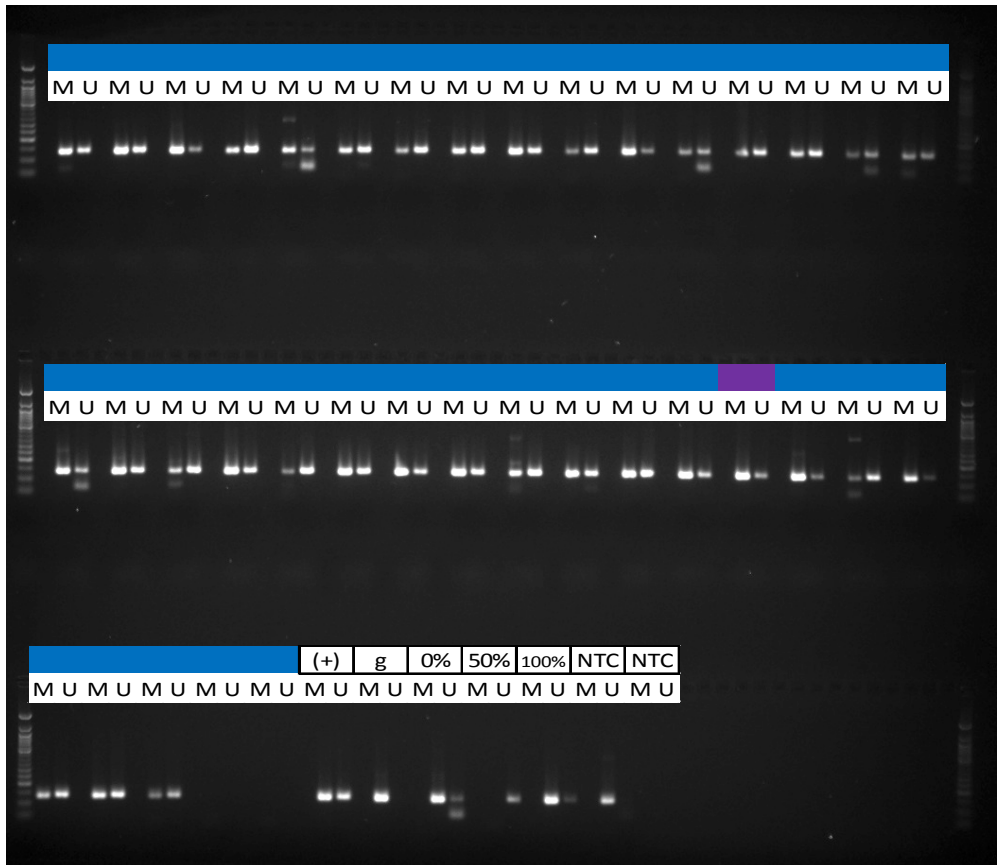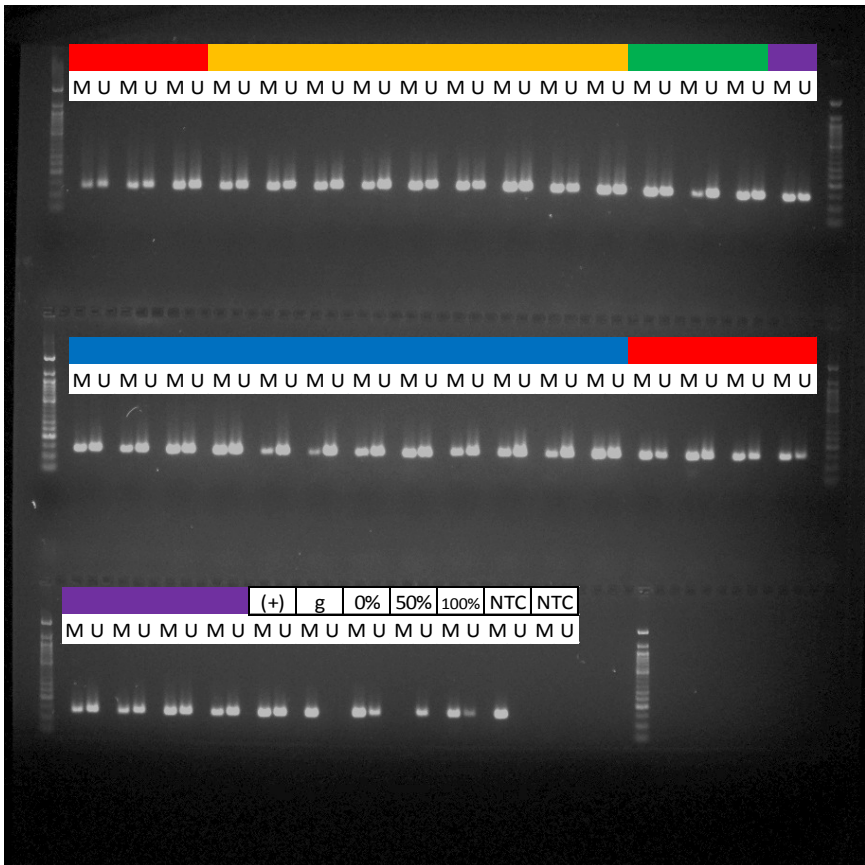

- SAC (Serous)
- CCC (Clear cell)
- EAC (Endometrioid)
- MAC (Mucinous)
- adenoca. or unknown
- OSE (Ovarian surface epithelium)
- Fallopian tube epithelium

Supplementary Figure 6 (cont.)

f)

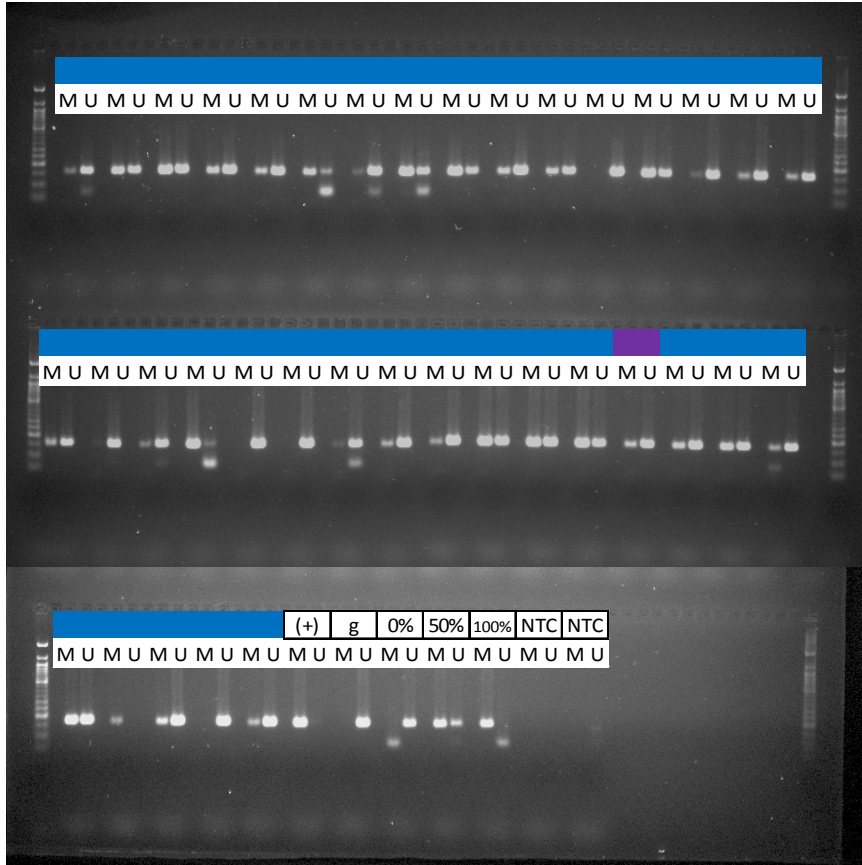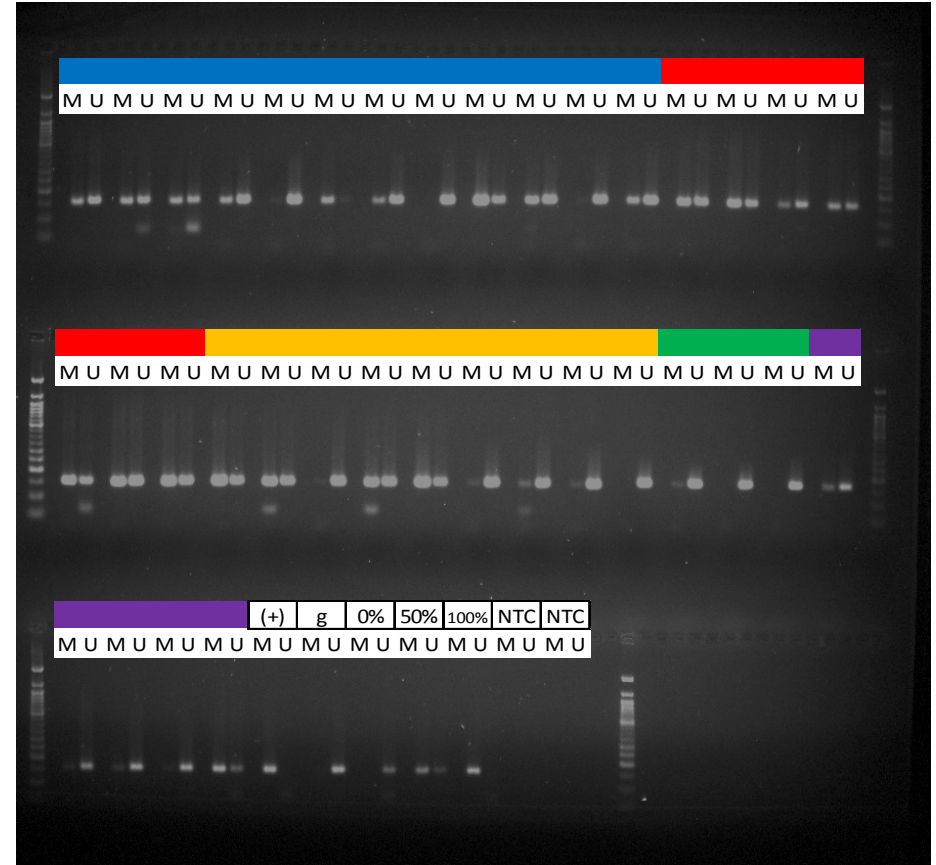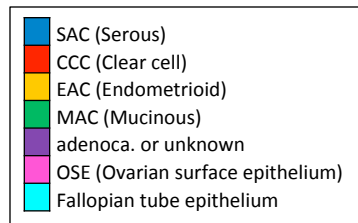

Supplement: NIHMS707390-supplement-Supplemental.pdf [file NIHMS707390-supplement-Supplemental.pdf]
